# Supplementary material for: Three-component selective synthesis of phenothiazines and bis-phenothiazines under metal-free conditions
Source: Royal Society of Chemistry journal article supplement (doi:10.1039/d3ob00055a), 2023-01-01

# Supporting Information

## Three components selective synthesis of phenothiazines and bis-phenothiazines under metal-free conditions

Shanping Chen,<sup>a,\*</sup> Zhuoqin Li,<sup>a,‡</sup> Kai Hu,<sup>a,‡</sup> Wei Feng,<sup>a</sup> Guojiang Mao,<sup>b</sup> Fuhong  
Xiao,<sup>a,\*</sup> and Guo-Jun Deng<sup>a,\*</sup>

<sup>a</sup> Key Laboratory for Green Organic Synthesis and Application of Hunan Province, Key Laboratory of Environmentally Friendly Chemistry and Application of Ministry of Education, College of Chemistry, Xiangtan University, Xiangtan 411105, China. E-mail: [spchen@xtu.edu.cn](mailto:spchen@xtu.edu.cn); [gjdeng@xtu.edu.cn](mailto:gjdeng@xtu.edu.cn).

<sup>b</sup> School of Chemistry and Chemical Engineering, Henan Normal University Xinxiang, 453007, China.

### Table of Contents

|                                                                                   |     |
|-----------------------------------------------------------------------------------|-----|
| 1. General information .....                                                      | S2  |
| 2. General procedure .....                                                        | S2  |
| 3. Characterization data of products .....                                        | S4  |
| 4. References .....                                                               | S15 |
| 5. Crystal data and structure refinement for <b>3a</b> .....                      | S16 |
| 6. Copies of <sup>1</sup> H and <sup>13</sup> C NMR spectra of all products ..... | S26 |

## 1. General information

Unless otherwise noted, all commercially available reagents and solvents are reagent grade and were used without further purification. Column chromatography was performed using silica gel (200-300 mesh).  $^1\text{H}$  NMR,  $^{13}\text{C}$  NMR and  $^{19}\text{F}$  NMR spectra were recorded on Bruker-AV (400, 100 and 376 MHz, respectively) instrument internally referenced solvent signals. Mass spectra were measured on Agilent 5977 GC-MS instrument (EI). High-resolution mass spectra (HRMS) were performed on FTMS ICR MS BRUKER 7T or Agilent 6230 TOF LC/MS. Melting points were measured on BÜCHI B-545 melting point instrument and were uncorrected. X-ray crystal structure data was using collected on a SuperNova, Dual, Cu at zero, AtlasS2 diffractometer. The structures were solved by direct methods using Olex2 software. The structures of known compounds were further corroborated by comparing their NMR and MS data with those of literature.

## 2. General procedure

### 2.1 General procedure for the synthesis of phenothiazine 2a.

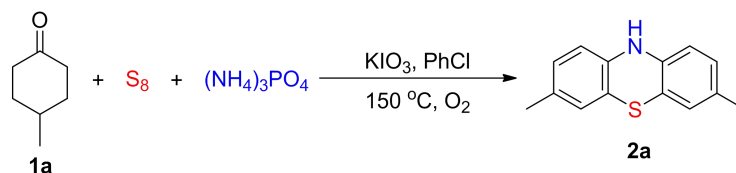

Ammonium phosphate trihydrate (60.9 mg, 0.3 mmol), elemental sulfur (25.6 mg, 0.1 mmol), potassium iodate (8.5 mg, 0.04 mmol) were added to an oven-dried reaction vessel (10 mL). The reaction vessel was purged with oxygen gas for three times and was added with 4-methylcyclohexan-1-one (52.0  $\mu\text{L}$ , 0.4 mmol) and chlorobenzene (0.6 mL) by syringe. The reaction vessel was stirred in an oil bath at 150 °C for 12 h. After cooling to room temperature, the reaction was diluted with ethyl acetate (20 mL) and the volatiles were removed under reduced pressure. The residue was purified by column chromatography on silica gel (petroleum ether) to yield the desired product **2a** as yellow solid (36.1 mg, 80% yield), mp: 243-245 °C.

## 2.2 General procedure for the synthesis of bis-phenothiazine 3a

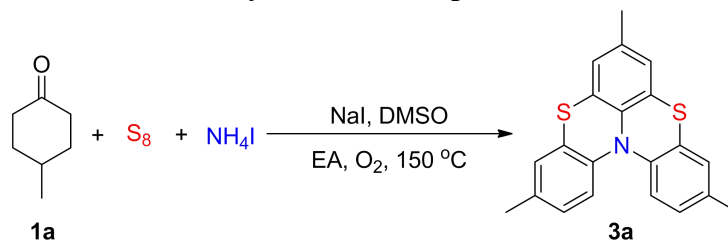

Ammonium iodide (73.0 mg, 0.5 mmol), sodium iodide (9.0 mg, 0.06 mmol) and elemental sulfur (51.2 mg, 0.2 mmol) were added to an oven-dried reaction vessel (10 mL). The reaction vessel was purged with oxygen gas for three times and was added with 4-methylcyclohexan-1-one (78.0  $\mu\text{L}$ , 0.6 mmol), dimethyl sulfoxide (28.0  $\mu\text{L}$ , 0.4 mmol) and ethyl acetate (0.6 mL) by syringe. The reaction vessel was stirred at  $150\text{ }^\circ\text{C}$  for 24 h. After cooling to room temperature, the reaction was diluted with ethyl acetate (20 mL) and the volatiles were removed under reduced pressure. The residue was purified by column chromatography on silica gel (petroleum ether) to yield the desired product **3a** as yellow solid (37.9 mg, 55% yield), mp:  $174\text{-}176\text{ }^\circ\text{C}$ .

## 2.3 The synthesis of 3d on 1.0 mmol scale

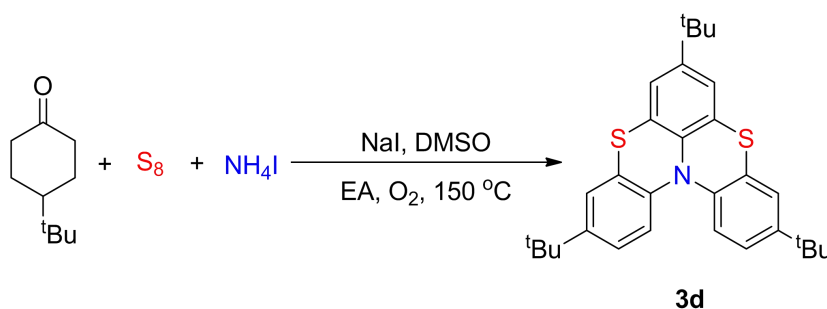

4-(*tert*-Butyl)cyclohexan-1-one (462.9 mg, 3.0 mmol), ammonium iodide (365.0 mg, 2.5 mmol) and elemental sulfur (256.0 mg, 1.0 mmol) were added to an oven-dried reaction vessel (10 mL). The reaction vessel was purged with oxygen gas for three times and was added with dimethyl sulfoxide (140.0  $\mu\text{L}$ , 2.0 mmol) and ethyl acetate (1.0 mL) by syringe. The reaction vessel was stirred at  $150\text{ }^\circ\text{C}$  for 24 h. After cooling to room temperature, the reaction was diluted with ethyl acetate (20 mL) and the volatiles were removed under reduced pressure. The residue was purified by column chromatography on silica gel (petroleum ether) to yield the desired product **3d** as yellow solid (227.0 mg, 48% yield), mp:  $282\text{-}286\text{ }^\circ\text{C}$ .

### 3. Characterization data of products

#### 3,7-Dimethyl-10H-phenothiazine (**2a**, CAS: 20751-71-7) <sup>[1]</sup>

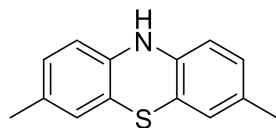

The reaction was conducted with ammonium phosphate trihydrate (60.9 mg, 0.3 mmol), elemental sulfur (25.6 mg, 0.1 mmol), potassium iodate (8.5 mg, 0.04 mmol) and 4-methylcyclohexan-1-one (78.0  $\mu$ L, 0.6 mmol). The residue was purified by column chromatography on silica gel (petroleum ether) to yield the desired product **2a** as yellow solid (36.1 mg, 80% yield), mp: 243-245 °C.

<sup>1</sup>H NMR (400 MHz, DMSO-*d*<sub>6</sub>)  $\delta$  8.33 (s, 1H), 6.77 (d, *J* = 8.0 Hz, 2H), 6.72 (s, 2H), 6.55 (d, *J* = 8.0 Hz, 2H), 2.11 (s, 6H); <sup>13</sup>C NMR (100 MHz, DMSO-*d*<sub>6</sub>)  $\delta$  139.8, 130.3, 127.9, 126.5, 116.1, 114.1, 19.9.

#### 10H-Phenothiazine (**2b**, CAS:92-84-2)<sup>[2]</sup>

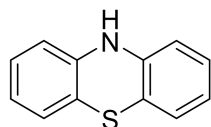

The reaction was conducted with ammonium phosphate trihydrate (60.9 mg, 0.3 mmol), elemental sulfur (25.6 mg, 0.1 mmol), potassium iodate (8.5 mg, 0.04 mmol) and cyclohexanone (44.0  $\mu$ L, 0.4 mmol). The residue was purified by column chromatography on silica gel (petroleum ether) to yield the desired product **2b** as white solid (23.9 mg, 60% yield), mp:187-189 °C.

<sup>1</sup>H NMR (400 MHz, Acetone-*d*<sub>6</sub>)  $\delta$  7.85 (s, 1H), 7.03 - 6.92 (m, 4H), 6.78 (t, *J* = 7.6 Hz, 2H), 6.71 (d, *J* = 8.0 Hz, 2H); <sup>13</sup>C NMR (100 MHz, Acetone-*d*<sub>6</sub>)  $\delta$  143.4, 128.4, 127.3, 123.0, 118.4, 115.4.

### 3,7-Diethyl-10H-phenothiazine (2c)

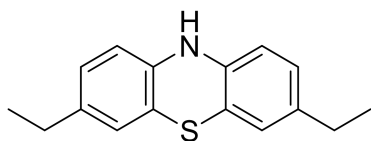

The reaction was conducted with ammonium phosphate trihydrate (60.9 mg, 0.3 mmol), elemental sulfur (25.6 mg, 0.1 mmol), potassium iodate (8.5 mg, 0.04 mmol) and 4-ethylcyclohexan-1-one (56.0  $\mu$ L, 0.4 mmol). The residue was purified by column chromatography on silica gel (petroleum ether) to yield the desired product **2c** as yellow solid (33.7 mg, 72% yield), mp: 161-163  $^{\circ}$ C.

$^1\text{H}$  NMR (400 MHz, Acetone- $d_6$ )  $\delta$  7.64 (s, 1H), 6.81 (d,  $J = 8.4$  Hz, 2H), 6.79 (s, 2H), 6.61 (d,  $J = 7.6$  Hz, 2H), 2.46 (q,  $J = 7.5$  Hz, 4H), 1.13 (t,  $J = 7.6$  Hz, 6H);  $^{13}\text{C}$  NMR (100 MHz, Acetone- $d_6$ )  $\delta$  141.4, 138.6, 127.6, 126.4, 118.2, 115.2, 28.5, 16.2. HRMS calcd for  $\text{C}_{16}\text{H}_{17}\text{NS}$   $[\text{M}+\text{H}]^+$  256.1154, found 256.1151.

### 3,7-Dipropyl-10H-phenothiazine (2d)

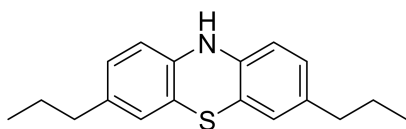

The reaction was conducted with ammonium phosphate trihydrate (60.9 mg, 0.3 mmol), elemental sulfur (25.6 mg, 0.1 mmol), potassium iodate (8.5 mg, 0.04 mmol) and 4-propylcyclohexan-1-one (65.0  $\mu$ L, 0.4 mmol). The residue was purified by column chromatography on silica gel (petroleum ether) to yield the desired product **2d** as yellow solid (36.8 mg, 65% yield), mp: 155-157  $^{\circ}$ C.

$^1\text{H}$  NMR (400 MHz, Acetone- $d_6$ )  $\delta$  7.64 (s, 1H), 6.83-6.75 (m, 4H), 6.61 (d,  $J = 8.0$  Hz, 2H), 2.41 (t,  $J = 7.6$  Hz, 4H), 1.59-1.49 (m, 4H), 0.88 (t,  $J = 7.4$  Hz, 6H);  $^{13}\text{C}$  NMR (100 MHz, Acetone- $d_6$ )  $\delta$  141.4, 137.0, 128.2, 127.0, 118.2, 115.1, 37.6, 25.4, 14.0. HRMS calcd for  $\text{C}_{18}\text{H}_{21}\text{NS}$   $[\text{M}+\text{H}]^+$  284.1467, found 284.1466.

### 3,7-Dipentyl-10H-phenothiazine (2e)

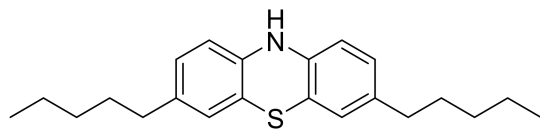

The reaction was conducted with ammonium phosphate trihydrate (60.9 mg, 0.3 mmol), elemental sulfur (25.6 mg, 0.1 mmol), potassium iodate (8.5 mg, 0.04 mmol) and 4-pentylcyclohexan-1-one (80.0  $\mu$ L, 0.4 mmol). The residue was purified by column chromatography on silica gel (petroleum ether/ EtOAc = 20/1) to yield the desired product **2e** as yellow solid (32.1 mg, 50% yield), mp: 149-150  $^{\circ}$ C.

$^1\text{H}$  NMR (400 MHz, Acetone- $d_6$ )  $\delta$  7.64 (s, 1H), 6.81-6.78 (m, 4H), 6.61 (d,  $J$  = 8.0 Hz, 2H), 2.44 (t,  $J$  = 7.6 Hz, 4H), 1.56-1.49 (d,  $J$  = 7.4 Hz, 4H), 1.32-1.25 (m, 8H), 0.87 (t,  $J$  = 6.8 Hz, 6H);  $^{13}\text{C}$  NMR (100 MHz, Acetone- $d_6$ )  $\delta$  141.4, 137.2, 128.2, 127.0, 118.2, 115.2, 35.5, 32.1, 23.2, 14.4. HRMS calcd for  $\text{C}_{22}\text{H}_{29}\text{NS}$   $[\text{M}+\text{H}]^+$  340.2093, found 340.2089.

### 3,7-Diisopropyl-10H-phenothiazine (2f)

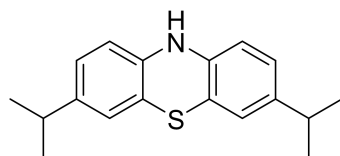

The reaction was conducted with ammonium phosphate trihydrate (60.9 mg, 0.3 mmol), elemental sulfur (25.6 mg, 0.1 mmol), potassium iodate (8.5 mg, 0.04 mmol) and 4-isopropylcyclohexan-1-one (62.2  $\mu$ L, 0.4 mmol). The residue was purified by column chromatography on silica gel (petroleum ether) to yield the desired product **2f** as yellow solid (33.9 mg, 60% yield), mp: 171-173  $^{\circ}$ C.

$^1\text{H}$  NMR (400 MHz, Acetone- $d_6$ )  $\delta$  7.64 (s, 1H), 6.89 - 6.77 (m, 4H), 6.63 (d,  $J$  = 8.0 Hz, 2H), 2.78-2.71 (m, 2H), 1.15 (d,  $J$  = 6.8 Hz, 12H).  $^{13}\text{C}$  NMR (100 MHz, Acetone- $d_6$ )  $\delta$  138.7, 136.8, 121.5, 120.4, 113.6, 110.6, 29.3, 19.7. HRMS calcd for  $\text{C}_{18}\text{H}_{21}\text{NS}$   $[\text{M}+\text{H}]^+$  284.1467, found 284.1464.

### 3,7-Di-*tert*-butyl-10*H*-phenothiazine (**2g**, CAS:27075-55-4)<sup>[3]</sup>

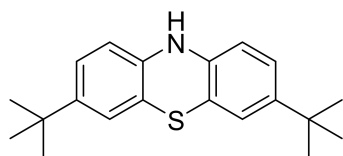

The reaction was conducted with ammonium phosphate trihydrate (60.9 mg, 0.3 mmol), elemental sulfur (25.6 mg, 0.1 mmol), potassium iodate (8.5 mg, 0.04 mmol) and 4-(*tert*-butyl)cyclohexan-1-one (67.3 mg, 0.4 mmol). The residue was purified by column chromatography on silica gel (petroleum ether) to yield the desired product **2g** as white solid (31.0 mg, 52% yield), mp: 217-219 °C.

<sup>1</sup>H NMR (400 MHz, Acetone-*d*<sub>6</sub>) δ 7.67 (s, 1H), 7.01 (d, *J* = 8.4 Hz, 2H), 6.98 (s, 2H), 6.64 (d, *J* = 8.0 Hz, 2H), 1.24 (s, 18H). <sup>13</sup>C NMR (100 MHz, Acetone-*d*<sub>6</sub>) δ 145.6, 141.2, 125.1, 124.1, 118.0, 115.0, 34.6, 31.7.

### 3,7-Di-*tert*-pentyl-10*H*-phenothiazine (**2h**)

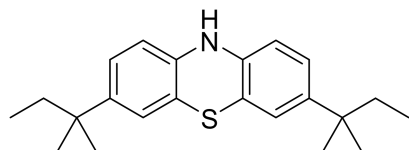

The reaction was conducted with ammonium phosphate trihydrate (60.9 mg, 0.3 mmol), elemental sulfur (25.6 mg, 0.1 mmol), potassium iodate (8.5 mg, 0.04 mmol) and 4-(*tert*-pentyl)cyclohexan-1-one (77.0 μL, 0.4 mmol). The residue was purified by column chromatography on silica gel (petroleum ether) to yield the desired product **2h** as white solid (33.2 mg, 52% yield), mp: 214-215 °C.

<sup>1</sup>H NMR (400 MHz, Acetone-*d*<sub>6</sub>) δ 7.68 (s, 1H), 6.96 (d, *J* = 8.0 Hz, 2H), 6.92 (s, 2H), 6.66 (d, *J* = 8.0 Hz, 2H), 1.62-1.54 (m, 4H), 1.20 (s, 12H), 0.65 (t, *J* = 7.4 Hz, 6H). <sup>13</sup>C NMR (100 MHz, Acetone-*d*<sub>6</sub>) δ 143.8, 141.2, 125.8, 124.8, 118.1, 115.0, 38.0, 37.3, 28.9, 9.5. HRMS calcd for C<sub>22</sub>H<sub>29</sub>NS [M+H]<sup>+</sup> 340.2093, found 340.2100.

### 3,7-Bis(4-propylcyclohexyl)-10H-phenothiazine (2i)

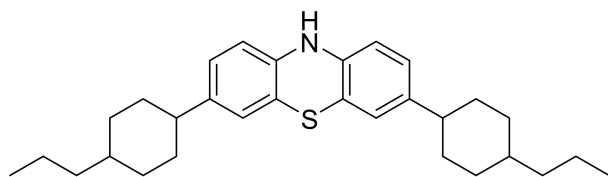

The reaction was conducted with ammonium phosphate trihydrate (60.9 mg, 0.3 mmol), elemental sulfur (25.6 mg, 0.1 mmol), potassium iodate (8.5 mg, 0.04 mmol) and 4'-propyl-[1,1'-bi(cyclohexan)]-4-one (89.0 mg, 0.4 mmol). The residue was purified by column chromatography on silica gel (petroleum ether/ EtOAc = 20/1) to yield the desired product **2i** as yellow solid (56.4 mg, 63% yield), mp: 258-260 °C.

<sup>1</sup>H NMR (400 MHz, DMSO-*d*<sub>6</sub>) δ 8.36 (s, 1H), 6.81 (d, *J* = 8.4 Hz, 2H), 6.73 (s, 2H), 6.57 (d, *J* = 8.0 Hz, 2H), 2.33-2.23 (m, 2H), 1.78-1.68 (m, 8H), 1.36-1.27 (m, 10H), 1.18-1.13 (m, 4H), 1.00-0.91 (m, 4H), 0.86 (t, *J* = 7.2 Hz, 6H). <sup>13</sup>C NMR (100 MHz, DMSO-*d*<sub>6</sub>) δ 140.8, 140.3, 125.7, 124.3, 116.1, 114.2, 42.9, 36.3, 33.9, 33.1, 19.5, 14.3. HRMS calcd for C<sub>30</sub>H<sub>41</sub>NS [M+H]<sup>+</sup> 488.3032, found 488.3026.

### 3,7-Di(1,4-dioxaspiro[4.5]decan-8-yl)-10H-phenothiazine (2j)

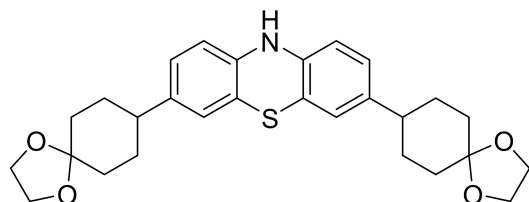

The reaction was conducted with ammonium phosphate trihydrate (60.9 mg, 0.3 mmol), elemental sulfur (25.6 mg, 0.1 mmol), potassium iodate (8.5 mg, 0.04 mmol) and 4-(1,4-dioxaspiro[4.5]decan-8-yl)cyclohexan-1-one (97.0 mg, 0.4 mmol). The residue was purified by column chromatography on silica gel (petroleum ether/ EtOAc = 20/1) to yield the desired product **2j** as white solid (42.2 mg, 44% yield), mp: 262-265 °C.

<sup>1</sup>H NMR (400 MHz, Acetone-*d*<sub>6</sub>) δ 7.68 (s, 1H), 6.85 (d, *J* = 8.0 Hz, 2H), 6.82 (s, 2H), 6.63 (d, *J* = 7.6 Hz, 2H), 3.94-3.86 (m, 8H), 2.50-2.44 (m, 2H), 1.79-1.59 (m, 16H). <sup>13</sup>C NMR (100 MHz, Acetone-*d*<sub>6</sub>) δ 141.7, 141.5, 126.5, 125.5, 115.3, 108.8, 64.9, 64.8, 43.0, 35.8, 32.4. HRMS calcd for C<sub>28</sub>H<sub>33</sub>NS [M+H]<sup>+</sup> 480.2203, found 480.2204.



### 3,7-Dimethoxy-10*H*-phenothiazine (**2l**)

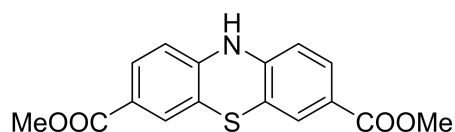

The reaction was conducted with ammonium phosphate trihydrate (60.9 mg, 0.3 mmol), elemental sulfur (25.6 mg, 0.1 mmol), potassium iodate (8.5 mg, 0.04 mmol) and 4-phenylcyclohexan-1-one (60.0  $\mu$ L, 0.4 mmol). The residue was purified by column chromatography on silica gel (petroleum ether/ EtOAc = 20/1) to yield the desired product **2l** as yellow solid (43.0 mg, 83% yield), mp: 278-280 °C.

$^1\text{H}$  NMR (400 MHz, DMSO- $d_6$ )  $\delta$  9.51 (s, 1H), 7.57 (d,  $J$  = 8.4, 2H), 7.39 (s, 2H), 6.70 (d,  $J$  = 8.4 Hz, 2H), 3.77 (s, 6H).  $^{13}\text{C}$  NMR (100 MHz, DMSO- $d_6$ )  $\delta$  165.2, 144.5, 129.7, 127.0, 123.6, 116.1, 114.4. HRMS calcd for  $\text{C}_{16}\text{H}_{13}\text{NO}_2\text{S}$   $[\text{M}+\text{H}]^+$  259.0667, found 259.0665.

### 3,7-Diethoxy-10*H*-phenothiazine (**2m**)

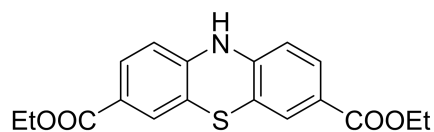

The reaction was conducted with ammonium phosphate trihydrate (60.9 mg, 0.3 mmol), elemental sulfur (25.6 mg, 0.1 mmol), potassium iodate (8.5 mg, 0.04 mmol) and 4-ethoxycyclohexan-1-one (64.0  $\mu$ L, 0.4 mmol). The residue was purified by column chromatography on silica gel (petroleum ether/ EtOAc = 20/1) to yield the desired product **2m** as yellow solid (48.8 mg, 85% yield), mp: 240-242 °C.

$^1\text{H}$  NMR (400 MHz, DMSO- $d_6$ )  $\delta$  9.50 (s, 1H), 7.57 (d,  $J$  = 8.4, 2H), 7.39 (s, 2H), 6.70 (d,  $J$  = 8.4 Hz, 2H), 4.23 (q,  $J$  = 7.2 Hz, 4H), 1.28 (t,  $J$  = 7.2 Hz, 6H).  $^{13}\text{C}$  NMR (100 MHz, DMSO- $d_6$ )  $\delta$  164.6, 144.4, 129.6, 126.9, 123.8, 116.0, 114.4, 60.4, 14.2. HRMS calcd for  $\text{C}_{18}\text{H}_{17}\text{NO}_2\text{S}$   $[\text{M}+\text{H}]^+$  287.0980, found 287.0983.

### 3,7-Diphenyl-10*H*-phenothiazine (**2n**)

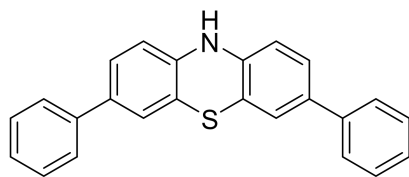

The reaction was conducted with ammonium phosphate trihydrate (60.9 mg, 0.3 mmol), elemental sulfur (25.6 mg, 0.1 mmol), potassium iodate (8.5 mg, 0.04 mmol) and 4-phenylcyclohexan-1-one (74.0 mg, 0.4 mmol). The residue was purified by column chromatography on silica gel (petroleum ether/ EtOAc = 20/1) to yield the desired product **2n** as yellow solid (109.9 mg, 85% yield), mp: 287-289 °C.

<sup>1</sup>H NMR (400 MHz, DMSO-*d*<sub>6</sub>) δ 8.86 (s, 1H), 7.58 (d, *J* = 7.6 Hz, 4H), 7.40 (t, *J* = 7.4 Hz, 4H), 7.36-7.22 (m, 6H), 6.76 (d, *J* = 8.0 Hz, 2H). <sup>13</sup>C NMR (100 MHz, DMSO-*d*<sub>6</sub>) δ 141.0, 139.1, 133.8, 128.9, 126.9, 126.0, 125.8, 124.2, 116.9, 114.8. HRMS calcd for C<sub>24</sub>H<sub>17</sub>ONS [M+H]<sup>+</sup> 352.1154, found 352.1146.

### 3,7-Bis(4-chlorophenyl)-10*H*-phenothiazine (**2o**)

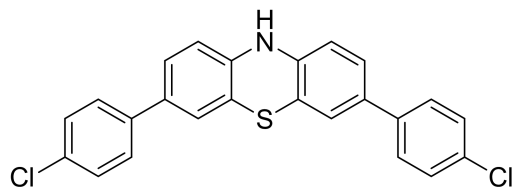

The reaction was conducted with ammonium phosphate trihydrate (60.9 mg, 0.3 mmol), elemental sulfur (25.6 mg, 0.1 mmol), potassium iodate (8.5 mg, 0.04 mmol) and 4-(4-chlorophenyl)cyclohexan-1-one (83.5 mg, 0.4 mmol). The residue was purified by column chromatography on silica gel (petroleum ether/ EtOAc = 20/1) to yield the desired product **2o** as yellow solid (52.1 mg, 62% yield), mp: 290-291 °C.

<sup>1</sup>H NMR (400 MHz, DMSO-*d*<sub>6</sub>) δ 8.89 (s, 1H), 7.61 (d, *J* = 8.8 Hz, 4H), 7.44 (d, *J* = 8.4 Hz, 4H), 7.32 (d, *J* = 8.2, 2H), 7.26 (s, 2H), 6.75 (d, *J* = 8.4 Hz, 2H). <sup>13</sup>C NMR (100 MHz, DMSO) δ 141.1, 137.9, 132.4, 131.6, 128.8, 127.5, 125.9, 124.1, 116.9, 114.8. HRMS calcd for C<sub>24</sub>H<sub>15</sub>Cl<sub>2</sub>NS [M+H]<sup>+</sup> 420.0375, found 420.0377

### 1,9-Dimethyl-10H-phenothiazine (2q)

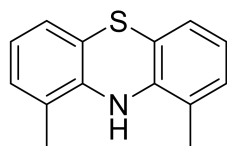

The reaction was conducted with ammonium phosphate trihydrate (60.9 mg, 0.3 mmol), elemental sulfur (25.6 mg, 0.1 mmol), potassium iodate (8.5 mg, 0.04 mmol) and 2-methylcyclohexan-1-one (52.0  $\mu$ l, 0.4 mmol). The residue was purified by column chromatography on silica gel (petroleum ether/ EtOAc = 20/1) to yield the desired product **2q** as yellow oil (29.1 mg, 64% yield).

$^1\text{H}$  NMR (400 MHz, DMSO- $d_6$ )  $\delta$  6.95 (d,  $J$  = 7.45 Hz, 2H), 6.87 (d,  $J$  = 7.62 Hz, 2H), 6.77 (d,  $J$  = 7.6 Hz, 2H), 6.27 (s, 1H), 2.31 (s, 6H);  $^{13}\text{C}$  NMR (100 MHz, Acetone- $d_6$ )  $\delta$  141.2, 129.9, 125.3, 123.5, 123.0, 119.0, 17.0. HRMS calcd for  $\text{C}_{14}\text{H}_{13}\text{NS}$   $[\text{M}+\text{H}]^+$  228.0841, found 228.0840.

### 3,7,11-Trimethylbenzo[5,6][1,4]thiazino[2,3,4-*kl*]phenothiazine (3a, CAS: 1051398-72-1)<sup>[4]</sup>

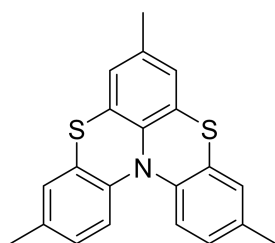

The reaction was conducted with ammonium iodide (73.0 mg, 0.5 mmol) and elemental sulfur (51.2 mg, 0.2 mmol) and dimethyl sulfoxide (28.0  $\mu$ L, 0.4 mmol) and ethyl acetate (0.6 mL) and 4-methylcyclohexan-1-one (78.0  $\mu$ L, 0.6 mmol). The residue was purified by column chromatography on silica gel (petroleum ether) to yield the desired product **3a** as yellow solid (37.9 mg, 55% yield), mp: 174-176  $^{\circ}\text{C}$ .

$^1\text{H}$  NMR (400 MHz, Chloroform- $d$ )  $\delta$  7.04 (d,  $J$  = 8.0 Hz, 2H), 7.00 (s, 2H), 6.90 (d,  $J$  = 8.0 Hz, 2H), 6.77 (s, 2H), 2.28 (s, 6H), 2.21 (s, 3H).  $^{13}\text{C}$  NMR (100 MHz, Chloroform- $d$ )  $\delta$  140.3, 137.4, 134.5, 134.1, 128.2, 128.1, 126.6, 126.1, 125.4, 120.2, 20.7, 20.5.

### 3,7,11-Triethylbenzo[5,6][1,4]thiazino[2,3,4-kl]phenothiazine (3b)

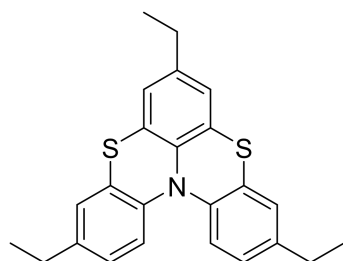

The reaction was conducted with ammonium iodide (73.0 mg, 0.5 mmol) and elemental sulfur (51.2 mg, 0.2 mmol) and dimethyl sulfoxide (28.0  $\mu$ L, 0.4 mmol) and ethyl acetate (0.6 mL) and 4-ethylcyclohexan-1-one (84.6  $\mu$ L, 0.6 mmol). The residue was purified by column chromatography on silica gel (petroleum ether) to yield the desired product **3b** as yellow oil (33.1 mg, 42% yield).

$^1\text{H}$  NMR (400 MHz, Chloroform-*d*)  $\delta$  7.08 (d,  $J$  = 8.4 Hz, 2H), 7.03 (s, 2H), 6.93 (d,  $J$  = 8.0 Hz, 2H), 6.81 (s, 2H), 2.58 (q,  $J$  = 7.5 Hz, 4H), 2.51 (q,  $J$  = 7.6 Hz, 2H), 1.22 (t,  $J$  = 7.6 Hz, 6H), 1.16 (t,  $J$  = 7.6 Hz, 3H).  $^{13}\text{C}$  NMR (100 MHz, Chloroform-*d*)  $\delta$  141.0, 140.7, 137.6, 127.1, 127.0, 126.7, 125.6, 125.0, 120.4, 117.6, 28.2, 28.0, 15.7, 15.6. HRMS calcd. for  $\text{C}_{24}\text{H}_{23}\text{NS}_2$   $[\text{M}+\text{H}]^+$  390.1345, found 390.1346

### 3,7,11-Tripropylbenzo[5,6][1,4]thiazino[2,3,4-kl]phenothiazine (3c)

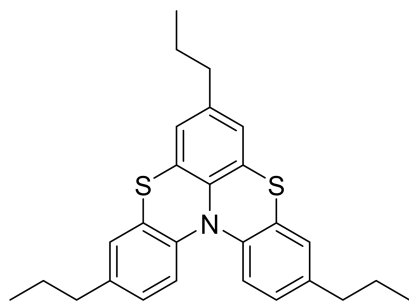

The reaction was conducted with ammonium iodide (73.0 mg, 0.5 mmol) and elemental sulfur (51.2 mg, 0.2 mmol) and dimethyl sulfoxide (28.0  $\mu$ L, 0.4 mmol) and ethyl acetate (0.6 mL) and 4-propylcyclohexan-1-one (94  $\mu$ L, 0.6 mmol). The residue was purified by column chromatography on silica gel (petroleum ether) to yield the desired product **3c** as yellow oil (40.2 mg, 46% yield).

$^1\text{H}$  NMR (400 MHz, Chloroform-*d*)  $\delta$  7.09 (d,  $J$  = 8.4 Hz, 2H), 7.02 (s, 2H), 6.92 (d,  $J$  = 8.0 Hz, 2H), 6.79 (s, 2H), 2.54-2.44 (m, 6H), 1.65-1.54 (m, 6H), 0.94-0.89 (m, 9H).  $^{13}\text{C}$  NMR (100 MHz,

Chloroform-*d*)  $\delta$  140.6, 139.4, 139.1, 137.6, 127.7, 127.6, 126.6, 125.6, 125.5, 120.3, 37.3, 37.0, 24.6, 24.4, 13.9, 13.8. HRMS calcd. for  $C_{27}H_{29}NS_2$   $[M+H]^+$  432.1814, found 432.1815.

### 3,7,11-Tri-*tert*-butylbenzo[5,6][1,4]thiazino[2,3,4-*kl*]phenothiazine (3d)

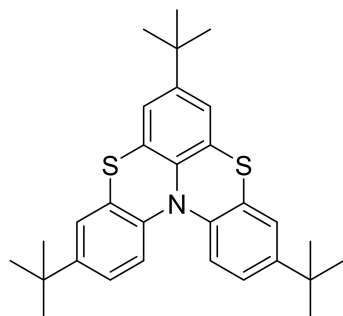

The reaction was conducted with ammonium iodide (73.0 mg, 0.5 mmol) and elemental sulfur (51.2 mg, 0.2 mmol) and dimethyl sulfoxide (28.0  $\mu$ L, 0.4 mmol) and ethyl acetate (0.6 mL) and 4-(*tert*-butyl)cyclohexan-1-one (101.0 mg, 0.6 mmol). The residue was purified by column chromatography on silica gel (petroleum ether) to yield the desired product **3d** as yellow solid (55.8 mg, 59% yield), mp: 282-286  $^{\circ}$ C.

$^1$ H NMR (400 MHz, Chloroform-*d*)  $\delta$  7.21 (s, 2H), 7.14-7.10 (m, 4H), 6.98 (s, 2H), 1.30 (s, 18H), 1.25 (s, 9H).  $^{13}$ C NMR (100 MHz, Chloroform-*d*)  $\delta$  148.2, 147.8, 140.2, 126.1, 125.2, 124.8, 124.6, 122.8, 120.0, 34.5, 34.5, 31.4, 31.3. HRMS calcd for  $C_{30}H_{35}NS_2$   $[M+H]^+$  474.2284, found 474.2284.

### 3,7,11-Tri-*tert*-pentylbenzo[5,6][1,4]thiazino[2,3,4-*kl*]phenothiazine (3e)

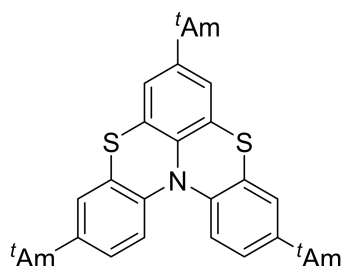

The reaction was conducted with ammonium iodide (73.0 mg, 0.5 mmol) and elemental sulfur (51.2 mg, 0.2 mmol) and dimethyl sulfoxide (28.0  $\mu$ L, 0.4 mmol) and ethyl acetate (0.6 mL) and 4-(*tert*-pentyl)cyclohexan-1-one (112.0  $\mu$ L, 0.6 mmol). The residue was purified by column chromatography on silica gel (petroleum ether) to yield the desired product **3g** as yellow solid

(32.4 mg, 31% yield), mp:186-188 °C.

<sup>1</sup>H NMR (400 MHz, Chloroform-*d*) δ 7.15-7.13 (m, 3H), 7.08-7.05 (m, 3H), 6.94 (d, *J* = 8.8 Hz, 2H), 1.63-1.58 (m, 6H), 1.26-1.21 (m, 18H), 0.73-0.67 (m, 9H). <sup>13</sup>C NMR (100 MHz, Chloroform-*d*) δ 150.2, 146.4, 146.1, 145.9, 140.0, 137.2, 126.0, 125.5, 125.4, 125.2, 125.2, 124.5, 123.4, 119.9, 119.6, 117.2, 37.8, 37.8, 36.9, 36.8, 28.6, 28.5, 9.3, 9.2. HRMS calcd. for C<sub>33</sub>H<sub>41</sub>NS<sub>2</sub> [M+H]<sup>+</sup> 516.2753, found 516.2737.

### 3,7,11-triphenylbenzo[5,6][1,4]thiazino[2,3,4-*k*]phenothiazine (3f)

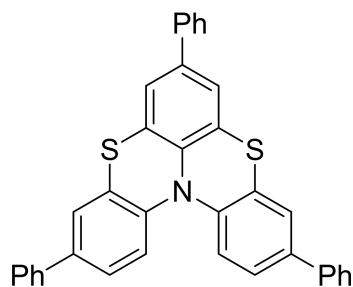

The reaction was conducted with ammonium iodide (73.0 mg, 0.5 mmol) and elemental sulfur (51.2 mg, 0.2 mmol) and dimethyl sulfoxide (28.0 μL, 0.4 mmol) and ethyl acetate (0.6 mL) and 4-phenylcyclohexan-1-one (105.0 mg, 0.6 mmol). The residue was purified by column chromatography on silica gel (petroleum ether) to yield the desired product **3f** as yellow solid (27.2 mg, 25% yield), mp: 220-222 °C.

<sup>1</sup>H NMR (400 MHz, Chloroform-*d*) δ 7.58-7.55 (m, 3H), 7.53-7.30 (m, 20H). <sup>13</sup>C NMR (100 MHz, Chloroform-*d*) δ 141.7, 139.9, 139.3, 138.7, 138.6, 138.2, 129.0, 128.9, 127.8, 127.6, 127.4, 126.8, 126.8, 126.5, 126.5, 126.1, 124.5, 121.0. HRMS calcd. for C<sub>36</sub>H<sub>23</sub>NS<sub>2</sub> [M+H]<sup>+</sup> 534.1345, found 534.1311.

### 3,7,11-Tri-*tert*-butylbenzo[5,6][1,4]thiazino[2,3,4-*kl*]phenothiazine 5,5,9,9-tetraoxide (4a)

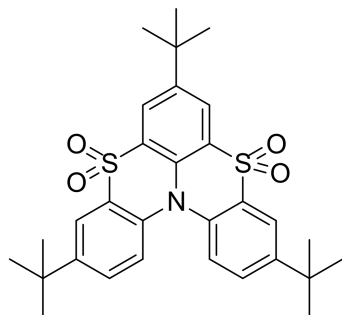

3,7,11-Tri-*tert*-butylbenzo[5,6][1,4]thiazino[2,3,4-*kl*]phenothiazine (47.3 mg, 0.1 mmol) and 3-chloroperbenzoic acid (86.7 mg, 0.5 mmol) and CH<sub>2</sub>Cl<sub>2</sub> (0.5 mL) were added to an oven-dried reaction vessel (10 mL). The reaction vessel was stirred at room temperature for 24 h. After the reaction finished, it was diluted with ethyl acetate (20 mL) and the volatiles were removed under reduced pressure. The residue was purified by column chromatography on silica gel (petroleum ether:ethyl acetate=3:1) to yield the desired product **A** as white solid (52,6 mg, 98% yield), mp:340-343 °C.

<sup>1</sup>H NMR (400 MHz, Chloroform-*d*) δ 8.33 (s, 2H), 8.14 (s, 2H), 7.62-7.61 (m, 4H), 1.42 (s, 9H), 1.39 (s, 18H). <sup>13</sup>C NMR (100 MHz, Chloroform-*d*): δ 150.0, 149.0, 137.1, 134.9, 131.0, 128.9, 128.6, 124.6, 121.9, 120.5, 35.6, 35.2, 31.3, 31.2. HRMS calcd. for C<sub>30</sub>H<sub>35</sub>NO<sub>4</sub>S<sub>2</sub> [M+H]<sup>+</sup> 538.2080, found 538.2085.

## 4. References

- [1] Chen, S.; Li, Y.; Xiang, S.; Li, S.; Tan, B. *Chem. Commun.*, **2021**, 57, 8512-8515.
- [2] Dai, C.; Sun, X.; Tu, X.; Wu, L.; Zhan, D.; Zeng, Q. *Chem. Commun.*, **2012**, 48, 5367-5369.
- [3] Levitskiy, O. A.; Dulov, D. A.; Bogdanov, A.V.; Magdesieva, T. V. *Eur. J. Org. Chem.*, **2019**, **2019**, 6225-6231.
- [4] Lamanna, G.; Faggi,.; Gasparrini, F.; Ciogli, A.; Villani, C.; Stephens, P. J.; Devlin, F. J.; Menichetti, S. *Chem. Eur. J.* 2008, 14, 5747 - 5750.

## 5. Crystal data and structure refinement for 3a.

The product **3a** (20.0 mg) were complete dissolved in DCM (0.5 mL) in a test tube. Then *n*-hexane (2.0 mL) were added dropwise, slow volatilized at room temperature. A few days later, the crystal was grown at room temperature.

A suitable crystal was collected, on a SuperNova, Dual, Cu at zero, AtlasS2 diffractometer. The data were collected and processed using CrysAlisPro. The structures were solved by direct methods using Olex2 software. The crystal was kept at 150.0(10) K during data collection.

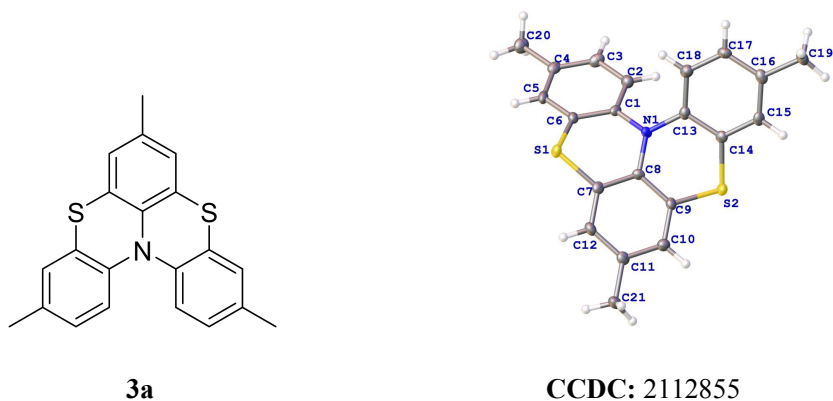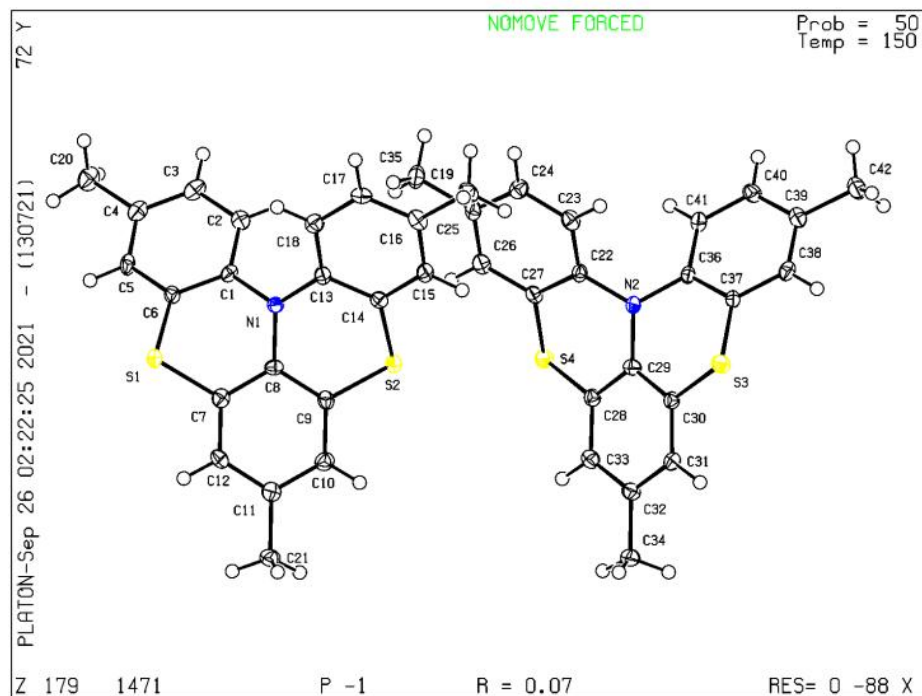

Figure S1. Ellipsoid plot of **3a** ( shown at 50% probability levels)



**Table 1.** Crystal data and structure refinement for **3a**.

|                                             |                                                               |
|---------------------------------------------|---------------------------------------------------------------|
| Identification code                         | <b>3a</b>                                                     |
| Empirical formula                           | C <sub>21</sub> H <sub>17</sub> NS <sub>2</sub>               |
| Formula weight                              | 347.48                                                        |
| Temperature/K                               | 149.99(10)                                                    |
| Crystal system                              | triclinic                                                     |
| Space group                                 | P-1                                                           |
| a/Å                                         | 7.6322(5)                                                     |
| b/Å                                         | 14.8230(11)                                                   |
| c/Å                                         | 15.0281(12)                                                   |
| $\alpha$ /°                                 | 83.056(7)                                                     |
| $\beta$ /°                                  | 82.898(6)                                                     |
| $\gamma$ /°                                 | 89.355(6)                                                     |
| Volume/Å <sup>3</sup>                       | 1674.7(2)                                                     |
| Z                                           | 4                                                             |
| $\rho_{\text{calc}}$ /cm <sup>3</sup>       | 1.378                                                         |
| $\mu$ /mm <sup>-1</sup>                     | 0.319                                                         |
| F(000)                                      | 728.0                                                         |
| Crystal size/mm <sup>3</sup>                | 0.15 × 0.13 × 0.12                                            |
| Radiation                                   | Mo K $\alpha$ ( $\lambda$ = 0.71073)                          |
| 2 $\Theta$ range for data collection/°      | 4.132 to 49.998                                               |
| Index ranges                                | -9 ≤ h ≤ 9, -17 ≤ k ≤ 17, -6 ≤ l ≤ 17                         |
| Reflections collected                       | 5879                                                          |
| Independent reflections                     | 5879 [R <sub>int</sub> = 0.0386, R <sub>sigma</sub> = 0.0606] |
| Data/restraints/parameters                  | 5879/0/440                                                    |
| Goodness-of-fit on F <sup>2</sup>           | 1.058                                                         |
| Final R indexes [I ≥ 2 $\sigma$ (I)]        | R <sub>1</sub> = 0.0687, wR <sub>2</sub> = 0.1862             |
| Final R indexes [all data]                  | R <sub>1</sub> = 0.0819, wR <sub>2</sub> = 0.1993             |
| Largest diff. peak/hole / e Å <sup>-3</sup> | 1.17/-0.77                                                    |

**Table 2.** Fractional Atomic Coordinates ( $\times 10^4$ ) and Equivalent Isotropic Displacement Parameters ( $\text{\AA}^2 \times 10^3$ ) for **3a**.  $U_{\text{eq}}$  is defined as 1/3 of the trace of the orthogonalised  $U_{ij}$  tensor.

| Atom | <i>x</i>   | <i>y</i>   | <i>z</i>   | $U(\text{eq})$ |
|------|------------|------------|------------|----------------|
| S1   | 8728.9(12) | 3180.9(6)  | 6234.1(6)  | 19.4(3)        |
| S2   | 5609.9(12) | 6540.2(6)  | 6199.1(6)  | 18.7(3)        |
| N1   | 6973(4)    | 4770(2)    | 7079.3(19) | 16.8(6)        |
| C1   | 6515(5)    | 3894(2)    | 7549(2)    | 14.5(8)        |
| C2   | 5371(5)    | 3808(3)    | 8362(2)    | 19.0(8)        |
| C3   | 4933(5)    | 2946(3)    | 8817(3)    | 20.7(8)        |
| C4   | 5564(5)    | 2159(3)    | 8478(3)    | 19.3(8)        |
| C5   | 6672(5)    | 2259(2)    | 7661(2)    | 17.9(8)        |
| C6   | 7171(4)    | 3110(2)    | 7210(2)    | 14.9(8)        |
| C7   | 7968(4)    | 4186(2)    | 5637(2)    | 16.4(8)        |
| C8   | 7210(4)    | 4874(2)    | 6119(2)    | 14.3(7)        |
| C9   | 6695(5)    | 5677(2)    | 5625(2)    | 15.7(8)        |
| C10  | 6968(5)    | 5789(3)    | 4683(2)    | 19.2(8)        |
| C11  | 7699(5)    | 5094(3)    | 4208(2)    | 18.2(8)        |
| C12  | 8179(5)    | 4289(3)    | 4704(2)    | 17.8(8)        |
| C13  | 7187(4)    | 5530(2)    | 7544(2)    | 15.7(8)        |
| C14  | 6682(4)    | 6396(2)    | 7180(2)    | 14.8(8)        |
| C15  | 6956(5)    | 7150(2)    | 7611(2)    | 16.7(8)        |
| C16  | 7677(5)    | 7077(3)    | 8422(2)    | 18.1(8)        |
| C17  | 8156(5)    | 6210(3)    | 8787(2)    | 18.1(8)        |
| C18  | 7943(5)    | 5452(3)    | 8345(2)    | 19.1(8)        |
| C19  | 7986(5)    | 7917(3)    | 8863(3)    | 21.1(8)        |
| C20  | 5067(5)    | 1232(3)    | 8960(3)    | 25.0(9)        |
| C21  | 7966(6)    | 5213(3)    | 3195(2)    | 23.1(8)        |
| S3   | 3664.6(12) | 11521.0(6) | 6261.8(6)  | 19.0(3)        |
| S4   | 756.4(12)  | 8148.8(6)  | 6284.2(6)  | 18.8(3)        |
| N2   | 2020(4)    | 9733(2)    | 7142.7(19) | 16.4(6)        |
| C22  | 2281(4)    | 8859(2)    | 7618(2)    | 14.8(7)        |
| C23  | 3014(5)    | 8765(3)    | 8431(2)    | 18.9(8)        |
| C24  | 3209(5)    | 7912(3)    | 8898(3)    | 18.5(8)        |
| C25  | 2749(5)    | 7122(3)    | 8559(2)    | 17.5(8)        |
| C26  | 2078(5)    | 7221(3)    | 7731(2)    | 19.0(8)        |
| C27  | 1822(4)    | 8073(2)    | 7273(2)    | 15.0(8)        |
| C28  | 1754(4)    | 9156(2)    | 5703(2)    | 15.0(8)        |
| C29  | 2237(4)    | 9842(2)    | 6182(2)    | 14.6(7)        |
| C30  | 2928(4)    | 10648(2)   | 5689(2)    | 14.7(7)        |

|     |         |          |         |         |
|-----|---------|----------|---------|---------|
| C31 | 3099(5) | 10772(3) | 4751(2) | 18.6(8) |
| C32 | 2650(5) | 10072(3) | 4275(2) | 18.1(8) |
| C33 | 2006(5) | 9259(3)  | 4758(2) | 18.8(8) |
| C34 | 2881(6) | 10192(3) | 3259(2) | 23.9(9) |
| C35 | 3009(5) | 6194(3)  | 9060(3) | 24.3(9) |
| C36 | 1514(4) | 10491(2) | 7613(2) | 14.1(7) |
| C37 | 2131(4) | 11359(2) | 7253(2) | 13.8(7) |
| C38 | 1613(5) | 12112(3) | 7696(2) | 17.5(8) |
| C39 | 537(5)  | 12023(3) | 8516(2) | 17.9(8) |
| C40 | -59(5)  | 11148(3) | 8876(3) | 18.4(8) |
| C41 | 395(5)  | 10398(3) | 8423(2) | 16.7(8) |
| C42 | -16(5)  | 12846(3) | 8979(3) | 23.8(9) |

**Table 3.** Anisotropic Displacement Parameters ( $\text{\AA}^2 \times 10^3$ ) for **3a**. The Anisotropic displacement factor exponent takes the form:  $-2\pi^2[h^2a^{*2}U_{11}+2hka^*b^*U_{12}+\dots]$ .

| Atom | $U_{11}$ | $U_{22}$ | $U_{33}$ | $U_{23}$ | $U_{13}$ | $U_{12}$ |
|------|----------|----------|----------|----------|----------|----------|
| S1   | 25.4(5)  | 13.4(5)  | 18.8(5)  | -1.8(4)  | -1.1(4)  | 5.0(4)   |
| S2   | 24.4(5)  | 15.0(5)  | 17.5(5)  | -3.3(4)  | -4.2(4)  | 5.2(4)   |
| N1   | 26.7(17) | 10.9(16) | 12.8(15) | -1.6(13) | -2.4(12) | -2.8(12) |
| C1   | 17.4(18) | 11.0(19) | 15.8(18) | 0.2(14)  | -6.1(14) | -4.5(14) |
| C2   | 19.2(19) | 19(2)    | 20(2)    | -3.8(16) | -2.5(15) | 0.8(15)  |
| C3   | 15.2(18) | 22(2)    | 23(2)    | 4.2(16)  | -2.7(15) | -4.7(15) |
| C4   | 20.4(19) | 17(2)    | 22(2)    | 0.4(16)  | -9.8(15) | -4.3(15) |
| C5   | 21.9(19) | 10.1(19) | 24(2)    | -3.9(15) | -9.8(15) | 0.1(15)  |
| C6   | 17.1(18) | 12.6(19) | 16.2(18) | -3.8(15) | -4.6(14) | -0.4(14) |
| C7   | 16.2(18) | 13.9(19) | 19.7(19) | -2.3(15) | -3.9(14) | -4.0(14) |
| C8   | 14.2(17) | 16.2(19) | 12.3(17) | -0.7(15) | -0.7(14) | -4.1(14) |
| C9   | 16.8(18) | 12.8(19) | 18.6(19) | -4.2(15) | -3.6(14) | -1.5(14) |
| C10  | 23(2)    | 17(2)    | 17.6(19) | -0.6(15) | -3.6(15) | -2.9(15) |
| C11  | 18.9(18) | 15.8(19) | 20.0(19) | -2.7(16) | -1.4(15) | -6.0(14) |
| C12  | 18.4(19) | 17(2)    | 18.5(19) | -7.1(15) | -1.1(14) | -1.2(15) |
| C13  | 15.1(18) | 13.2(19) | 17.7(19) | -1.4(15) | 2.1(14)  | -1.2(14) |
| C14  | 12.2(17) | 17(2)    | 15.0(18) | -1.9(15) | 1.1(13)  | -0.6(14) |
| C15  | 17.1(18) | 12.0(19) | 19.5(19) | -0.7(15) | 3.0(14)  | -4.0(14) |
| C16  | 14.7(18) | 18(2)    | 22(2)    | -5.8(16) | 2.5(14)  | -4.2(14) |
| C17  | 18.1(18) | 23(2)    | 13.3(18) | -2.6(16) | -2.2(14) | -1.6(15) |
| C18  | 19.6(19) | 19(2)    | 18.8(19) | -0.9(16) | -2.1(15) | 0.0(15)  |
| C19  | 25(2)    | 19(2)    | 20(2)    | -7.9(16) | -0.8(15) | -1.8(16) |

|     |          |          |          |          |          |          |
|-----|----------|----------|----------|----------|----------|----------|
| C20 | 26(2)    | 19(2)    | 31(2)    | -0.2(17) | -6.5(17) | -7.7(16) |
| C21 | 35(2)    | 19(2)    | 15.9(19) | -4.0(17) | -2.6(16) | -3.4(16) |
| S3  | 25.4(5)  | 13.7(5)  | 17.7(5)  | -3.3(4)  | -0.3(4)  | -6.4(4)  |
| S4  | 26.4(5)  | 12.9(5)  | 17.7(5)  | -2.6(4)  | -3.3(4)  | -6.4(4)  |
| N2  | 23.5(16) | 9.4(15)  | 15.6(15) | -1.2(13) | -0.5(13) | -1.0(12) |
| C22 | 13.7(17) | 11.8(18) | 17.6(18) | -0.3(14) | 1.6(13)  | 0.5(13)  |
| C23 | 18.1(19) | 17(2)    | 22(2)    | -5.3(16) | -1.2(15) | -3.3(15) |
| C24 | 15.3(18) | 20(2)    | 20(2)    | -0.2(16) | -2.6(14) | 1.4(15)  |
| C25 | 12.8(17) | 15(2)    | 22(2)    | -0.2(15) | 5.2(14)  | 2.6(14)  |
| C26 | 18.0(18) | 16(2)    | 21.4(19) | -3.3(16) | 3.8(15)  | -2.4(14) |
| C27 | 14.7(18) | 13.3(19) | 15.9(18) | -3.0(14) | 4.2(13)  | -3.3(14) |
| C28 | 14.3(18) | 14.6(19) | 15.9(18) | -2.2(15) | -0.7(13) | 0.0(14)  |
| C29 | 10.2(17) | 20(2)    | 13.2(17) | -2.4(16) | -0.9(13) | 2.0(14)  |
| C30 | 16.0(18) | 12.6(19) | 15.8(18) | -1.8(14) | -2.7(14) | -0.3(14) |
| C31 | 24(2)    | 13.1(19) | 17.3(19) | 0.7(15)  | 0.1(15)  | -0.4(15) |
| C32 | 18.8(19) | 20(2)    | 15.6(18) | -3.1(16) | -0.5(14) | 1.3(14)  |
| C33 | 19.5(19) | 19(2)    | 18.4(19) | -5.0(16) | -2.8(15) | 0.4(15)  |
| C34 | 38(2)    | 18(2)    | 15.4(19) | -2.7(16) | -3.1(17) | -0.4(16) |
| C35 | 28(2)    | 15(2)    | 29(2)    | -0.7(17) | -1.7(17) | 3.6(16)  |
| C36 | 15.8(18) | 11.0(18) | 16.2(18) | -1.8(14) | -4.8(14) | 2.1(13)  |
| C37 | 14.4(17) | 11.6(18) | 16.2(18) | -2.7(14) | -4.0(13) | 1.7(14)  |
| C38 | 18.9(18) | 14.2(19) | 20.2(19) | -0.2(15) | -7.2(15) | 0.9(14)  |
| C39 | 14.5(18) | 20(2)    | 21.5(19) | -7.6(16) | -8.8(14) | 4.7(14)  |
| C40 | 16.3(18) | 20(2)    | 17.9(19) | -4.0(16) | 1.2(14)  | 1.4(15)  |
| C41 | 16.3(18) | 12.8(19) | 20.8(19) | -1.6(15) | -1.5(14) | 0.7(14)  |
| C42 | 26(2)    | 22(2)    | 26(2)    | -9.6(17) | -6.8(16) | 5.6(16)  |

**Table 4.** Bond Lengths for **3a**.

| <b>Atom</b> | <b>Atom</b> | <b>Length/Å</b> | <b>Atom</b> | <b>Atom</b> | <b>Length/Å</b> |
|-------------|-------------|-----------------|-------------|-------------|-----------------|
| S1          | C6          | 1.764(4)        | S3          | C30         | 1.771(4)        |
| S1          | C7          | 1.774(4)        | S3          | C37         | 1.771(4)        |
| S2          | C9          | 1.769(4)        | S4          | C27         | 1.772(4)        |
| S2          | C14         | 1.763(4)        | S4          | C28         | 1.766(4)        |
| N1          | C1          | 1.425(4)        | N2          | C22         | 1.426(5)        |
| N1          | C8          | 1.422(4)        | N2          | C29         | 1.422(4)        |
| N1          | C13         | 1.417(5)        | N2          | C36         | 1.424(5)        |
| C1          | C2          | 1.405(5)        | C22         | C23         | 1.397(5)        |

| Atom | Atom | Length/Å | Atom | Atom | Length/Å |
|------|------|----------|------|------|----------|
| C1   | C6   | 1.388(5) | C22  | C27  | 1.397(5) |
| C2   | C3   | 1.397(5) | C23  | C24  | 1.385(5) |
| C3   | C4   | 1.388(6) | C24  | C25  | 1.397(5) |
| C4   | C5   | 1.395(5) | C25  | C26  | 1.395(5) |
| C4   | C20  | 1.504(5) | C25  | C35  | 1.510(5) |
| C5   | C6   | 1.391(5) | C26  | C27  | 1.387(5) |
| C7   | C8   | 1.402(5) | C28  | C29  | 1.393(5) |
| C7   | C12  | 1.380(5) | C28  | C33  | 1.399(5) |
| C8   | C9   | 1.403(5) | C29  | C30  | 1.400(5) |
| C9   | C10  | 1.395(5) | C30  | C31  | 1.389(5) |
| C10  | C11  | 1.397(6) | C31  | C32  | 1.397(5) |
| C11  | C12  | 1.399(5) | C32  | C33  | 1.391(5) |
| C11  | C21  | 1.499(5) | C32  | C34  | 1.504(5) |
| C13  | C14  | 1.402(5) | C36  | C37  | 1.397(5) |
| C13  | C18  | 1.390(5) | C36  | C41  | 1.391(5) |
| C14  | C15  | 1.388(5) | C37  | C38  | 1.397(5) |
| C15  | C16  | 1.390(5) | C38  | C39  | 1.386(5) |
| C16  | C17  | 1.399(5) | C39  | C40  | 1.402(5) |
| C16  | C19  | 1.513(5) | C39  | C42  | 1.507(5) |
| C17  | C18  | 1.394(5) | C40  | C41  | 1.390(5) |

**Table 5.** Bond Angles for **3a**.

| Atom | Atom | Atom | Angle/°   | Atom | Atom | Atom | Angle/°   |
|------|------|------|-----------|------|------|------|-----------|
| C6   | S1   | C7   | 99.18(17) | C37  | S3   | C30  | 98.86(16) |
| C14  | S2   | C9   | 98.78(17) | C28  | S4   | C27  | 99.25(16) |
| C8   | N1   | C1   | 118.5(3)  | C29  | N2   | C22  | 119.2(3)  |
| C13  | N1   | C1   | 121.8(3)  | C29  | N2   | C36  | 119.6(3)  |
| C13  | N1   | C8   | 119.7(3)  | C36  | N2   | C22  | 121.1(3)  |
| C2   | C1   | N1   | 120.5(3)  | C23  | C22  | N2   | 121.3(3)  |
| C6   | C1   | N1   | 121.0(3)  | C23  | C22  | C27  | 118.3(3)  |
| C6   | C1   | C2   | 118.6(3)  | C27  | C22  | N2   | 120.5(3)  |
| C3   | C2   | C1   | 120.0(4)  | C24  | C23  | C22  | 120.5(3)  |
| C4   | C3   | C2   | 121.8(4)  | C23  | C24  | C25  | 121.5(4)  |
| C3   | C4   | C5   | 117.3(3)  | C24  | C25  | C35  | 121.3(3)  |
| C3   | C4   | C20  | 121.8(4)  | C26  | C25  | C24  | 117.6(3)  |
| C5   | C4   | C20  | 120.9(4)  | C26  | C25  | C35  | 121.1(3)  |
| C6   | C5   | C4   | 121.9(3)  | C27  | C26  | C25  | 121.3(3)  |

|     |     |     |          |     |     |     |          |
|-----|-----|-----|----------|-----|-----|-----|----------|
| C1  | C6  | S1  | 120.4(3) | C22 | C27 | S4  | 120.4(3) |
| C1  | C6  | C5  | 120.4(3) | C26 | C27 | S4  | 118.7(3) |
| C5  | C6  | S1  | 119.1(3) | C26 | C27 | C22 | 120.7(3) |
| C8  | C7  | S1  | 119.4(3) | C29 | C28 | S4  | 120.1(3) |
| C12 | C7  | S1  | 119.5(3) | C29 | C28 | C33 | 121.0(3) |
| C12 | C7  | C8  | 121.0(3) | C33 | C28 | S4  | 118.9(3) |
| C7  | C8  | N1  | 121.3(3) | C28 | C29 | N2  | 121.2(3) |
| C7  | C8  | C9  | 118.0(3) | C28 | C29 | C30 | 117.9(3) |
| C9  | C8  | N1  | 120.7(3) | C30 | C29 | N2  | 120.9(3) |
| C8  | C9  | S2  | 119.8(3) | C29 | C30 | S3  | 119.8(3) |
| C10 | C9  | S2  | 119.4(3) | C31 | C30 | S3  | 118.8(3) |
| C10 | C9  | C8  | 120.7(3) | C31 | C30 | C29 | 121.4(3) |
| C9  | C10 | C11 | 120.9(3) | C30 | C31 | C32 | 120.3(3) |
| C10 | C11 | C12 | 118.1(3) | C31 | C32 | C34 | 120.6(3) |
| C10 | C11 | C21 | 120.6(4) | C33 | C32 | C31 | 118.8(3) |
| C12 | C11 | C21 | 121.2(4) | C33 | C32 | C34 | 120.6(3) |
| C7  | C12 | C11 | 121.2(3) | C32 | C33 | C28 | 120.5(3) |
| C14 | C13 | N1  | 119.9(3) | C37 | C36 | N2  | 119.7(3) |
| C18 | C13 | N1  | 121.8(3) | C41 | C36 | N2  | 121.9(3) |
| C18 | C13 | C14 | 118.3(3) | C41 | C36 | C37 | 118.4(3) |
| C13 | C14 | S2  | 120.8(3) | C36 | C37 | S3  | 120.9(3) |
| C15 | C14 | S2  | 118.9(3) | C38 | C37 | S3  | 118.7(3) |
| C15 | C14 | C13 | 120.2(3) | C38 | C37 | C36 | 120.3(3) |
| C14 | C15 | C16 | 122.0(3) | C39 | C38 | C37 | 121.7(3) |
| C15 | C16 | C17 | 117.5(3) | C38 | C39 | C40 | 117.4(3) |
| C15 | C16 | C19 | 120.4(3) | C38 | C39 | C42 | 120.7(3) |
| C17 | C16 | C19 | 122.1(3) | C40 | C39 | C42 | 121.8(3) |
| C18 | C17 | C16 | 121.1(3) | C41 | C40 | C39 | 121.3(3) |
| C13 | C18 | C17 | 120.9(3) | C40 | C41 | C36 | 120.8(3) |

**Table 6.** Torsion Angles for **3a**.

| <b>A</b> | <b>B</b> | <b>C</b> | <b>D</b> | <b>Angle/°</b> | <b>A</b> | <b>B</b> | <b>C</b> | <b>D</b> | <b>Angle/°</b> |
|----------|----------|----------|----------|----------------|----------|----------|----------|----------|----------------|
| S1       | C7       | C8       | N1       | -2.5(4)        | S3       | C30      | C31      | C32      | 175.4(3)       |
| S1       | C7       | C8       | C9       | 177.1(2)       | S3       | C37      | C38      | C39      | -174.4(3)      |
| S1       | C7       | C12      | C11      | -175.9(3)      | S4       | C28      | C29      | N2       | 3.0(5)         |
| S2       | C9       | C10      | C11      | -175.1(3)      | S4       | C28      | C29      | C30      | -176.3(3)      |
| S2       | C14      | C15      | C16      | 175.3(3)       | S4       | C28      | C33      | C32      | 174.6(3)       |
| N1       | C1       | C2       | C3       | -179.9(3)      | N2       | C22      | C23      | C24      | 178.0(3)       |
| N1       | C1       | C6       | S1       | 5.1(5)         | N2       | C22      | C27      | S4       | -4.7(5)        |

|     |     |     |     |           |     |     |     |     |           |
|-----|-----|-----|-----|-----------|-----|-----|-----|-----|-----------|
| N1  | C1  | C6  | C5  | -178.1(3) | N2  | C22 | C27 | C26 | 179.8(3)  |
| N1  | C8  | C9  | S2  | -4.2(4)   | N2  | C29 | C30 | S3  | 3.7(5)    |
| N1  | C8  | C9  | C10 | 178.4(3)  | N2  | C29 | C30 | C31 | -178.1(3) |
| N1  | C13 | C14 | S2  | 5.4(4)    | N2  | C36 | C37 | S3  | -4.7(5)   |
| N1  | C13 | C14 | C15 | -177.3(3) | N2  | C36 | C37 | C38 | 178.5(3)  |
| N1  | C13 | C18 | C17 | 179.4(3)  | N2  | C36 | C41 | C40 | 179.1(3)  |
| C1  | N1  | C8  | C7  | -36.1(5)  | C22 | N2  | C29 | C28 | 35.4(5)   |
| C1  | N1  | C8  | C9  | 144.3(3)  | C22 | N2  | C29 | C30 | -145.3(3) |
| C1  | N1  | C13 | C14 | -145.0(3) | C22 | N2  | C36 | C37 | 146.0(3)  |
| C1  | N1  | C13 | C18 | 37.2(5)   | C22 | N2  | C36 | C41 | -34.8(5)  |
| C1  | C2  | C3  | C4  | -1.6(5)   | C22 | C23 | C24 | C25 | 2.5(5)    |
| C2  | C1  | C6  | S1  | -175.6(3) | C23 | C22 | C27 | S4  | 175.9(3)  |
| C2  | C1  | C6  | C5  | 1.2(5)    | C23 | C22 | C27 | C26 | 0.4(5)    |
| C2  | C3  | C4  | C5  | 0.5(5)    | C23 | C24 | C25 | C26 | -0.2(5)   |
| C2  | C3  | C4  | C20 | -178.9(3) | C23 | C24 | C25 | C35 | 178.4(3)  |
| C3  | C4  | C5  | C6  | 1.6(5)    | C24 | C25 | C26 | C27 | -2.0(5)   |
| C4  | C5  | C6  | S1  | 174.4(3)  | C25 | C26 | C27 | S4  | -173.6(3) |
| C4  | C5  | C6  | C1  | -2.5(5)   | C25 | C26 | C27 | C22 | 1.9(5)    |
| C6  | S1  | C7  | C8  | 32.9(3)   | C27 | S4  | C28 | C29 | -32.5(3)  |
| C6  | S1  | C7  | C12 | -149.1(3) | C27 | S4  | C28 | C33 | 149.1(3)  |
| C6  | C1  | C2  | C3  | 0.8(5)    | C27 | C22 | C23 | C24 | -2.6(5)   |
| C7  | S1  | C6  | C1  | -34.3(3)  | C28 | S4  | C27 | C22 | 33.4(3)   |
| C7  | S1  | C6  | C5  | 148.8(3)  | C28 | S4  | C27 | C26 | -151.0(3) |
| C7  | C8  | C9  | S2  | 176.2(2)  | C28 | C29 | C30 | S3  | -176.9(3) |
| C7  | C8  | C9  | C10 | -1.3(5)   | C28 | C29 | C30 | C31 | 1.2(5)    |
| C8  | N1  | C1  | C2  | -144.5(3) | C29 | N2  | C22 | C23 | 145.1(3)  |
| C8  | N1  | C1  | C6  | 34.8(5)   | C29 | N2  | C22 | C27 | -34.2(5)  |
| C8  | N1  | C13 | C14 | 34.7(5)   | C29 | N2  | C36 | C37 | -35.1(5)  |
| C8  | N1  | C13 | C18 | -143.2(3) | C29 | N2  | C36 | C41 | 144.0(3)  |
| C8  | C7  | C12 | C11 | 2.1(5)    | C29 | C28 | C33 | C32 | -3.9(5)   |
| C8  | C9  | C10 | C11 | 2.3(5)    | C29 | C30 | C31 | C32 | -2.8(6)   |
| C9  | S2  | C14 | C13 | -34.8(3)  | C30 | S3  | C37 | C36 | 34.2(3)   |
| C9  | S2  | C14 | C15 | 147.8(3)  | C30 | S3  | C37 | C38 | -149.1(3) |
| C9  | C10 | C11 | C12 | -1.2(5)   | C30 | C31 | C32 | C33 | 1.0(6)    |
| C9  | C10 | C11 | C21 | 179.2(3)  | C30 | C31 | C32 | C34 | -178.2(4) |
| C10 | C11 | C12 | C7  | -1.0(5)   | C31 | C32 | C33 | C28 | 2.3(5)    |
| C12 | C7  | C8  | N1  | 179.4(3)  | C33 | C28 | C29 | N2  | -178.6(3) |
| C12 | C7  | C8  | C9  | -0.9(5)   | C33 | C28 | C29 | C30 | 2.1(5)    |
| C13 | N1  | C1  | C2  | 35.2(5)   | C34 | C32 | C33 | C28 | -178.5(4) |
| C13 | N1  | C1  | C6  | -145.5(3) | C35 | C25 | C26 | C27 | 179.4(3)  |

|     |     |     |     |           |     |     |     |     |           |
|-----|-----|-----|-----|-----------|-----|-----|-----|-----|-----------|
| C13 | N1  | C8  | C7  | 144.2(3)  | C36 | N2  | C22 | C23 | -36.1(5)  |
| C13 | N1  | C8  | C9  | -35.4(5)  | C36 | N2  | C22 | C27 | 144.6(3)  |
| C13 | C14 | C15 | C16 | -2.1(5)   | C36 | N2  | C29 | C28 | -143.5(3) |
| C14 | S2  | C9  | C8  | 33.9(3)   | C36 | N2  | C29 | C30 | 35.8(5)   |
| C14 | S2  | C9  | C10 | -148.6(3) | C36 | C37 | C38 | C39 | 2.4(5)    |
| C14 | C13 | C18 | C17 | 1.5(5)    | C37 | S3  | C30 | C29 | -33.4(3)  |
| C14 | C15 | C16 | C17 | 1.2(5)    | C37 | S3  | C30 | C31 | 148.4(3)  |
| C14 | C15 | C16 | C19 | 178.9(3)  | C37 | C36 | C41 | C40 | -1.8(5)   |
| C15 | C16 | C17 | C18 | 1.0(5)    | C37 | C38 | C39 | C40 | -1.7(5)   |
| C16 | C17 | C18 | C13 | -2.4(5)   | C37 | C38 | C39 | C42 | -179.5(3) |
| C18 | C13 | C14 | S2  | -176.6(3) | C38 | C39 | C40 | C41 | -0.7(5)   |
| C18 | C13 | C14 | C15 | 0.7(5)    | C39 | C40 | C41 | C36 | 2.5(5)    |
| C19 | C16 | C17 | C18 | -176.6(3) | C41 | C36 | C37 | S3  | 176.1(3)  |
| C20 | C4  | C5  | C6  | -179.0(3) | C41 | C36 | C37 | C38 | -0.6(5)   |
| C21 | C11 | C12 | C7  | 178.6(3)  | C42 | C39 | C40 | C41 | 177.1(3)  |

**Table 7.** Hydrogen Atom Coordinates ( $\text{\AA}\times 10^4$ ) and Isotropic Displacement Parameters ( $\text{\AA}^2\times 10^3$ ) for **3a**.

| Atom | <i>x</i> | <i>y</i> | <i>z</i> | U(eq) |
|------|----------|----------|----------|-------|
| H2   | 4905.64  | 4324.13  | 8597.6   | 23    |
| H3   | 4198.46  | 2899.56  | 9363.02  | 25    |
| H5   | 7090.21  | 1742.42  | 7410.46  | 21    |
| H10  | 6658.48  | 6334.59  | 4367.44  | 23    |
| H12  | 8650.49  | 3813.88  | 4399.97  | 21    |
| H15  | 6648.21  | 7721.56  | 7349.46  | 20    |
| H17  | 8624.81  | 6138.11  | 9333.94  | 22    |
| H18  | 8312.41  | 4885.32  | 8589.5   | 23    |
| H19A | 9226.8   | 8050.34  | 8789.81  | 32    |
| H19B | 7555.94  | 7812.18  | 9494.28  | 32    |
| H19C | 7370.16  | 8421.88  | 8583.16  | 32    |
| H20A | 3807.09  | 1160.28  | 9026.53  | 37    |
| H20B | 5466.58  | 1166.68  | 9545.06  | 37    |
| H20C | 5609.93  | 775.83   | 8615.04  | 37    |
| H21A | 6995.5   | 5549.29  | 2972.21  | 35    |
| H21B | 8026.27  | 4628.11  | 2981.08  | 35    |
| H21C | 9046.5   | 5539.43  | 2984.67  | 35    |
| H23  | 3373.89  | 9277.86  | 8660.46  | 23    |
| H24  | 3657.21  | 7864.91  | 9449.38  | 22    |
| H26  | 1796.78  | 6704.97  | 7480.65  | 23    |



|      |         |          |         |    |
|------|---------|----------|---------|----|
| H31  | 3513.02 | 11323.67 | 4438    | 22 |
| H33  | 1742.23 | 8779.61  | 4450.43 | 23 |
| H34A | 4115.4  | 10239.55 | 3038.98 | 36 |
| H34B | 2289.37 | 10735.09 | 3043.85 | 36 |
| H34C | 2384.34 | 9677.69  | 3047.13 | 36 |
| H35A | 2331.51 | 5753.46  | 8828.76 | 36 |
| H35B | 2622.57 | 6202.44  | 9691.77 | 36 |
| H35C | 4236.47 | 6036.31  | 8978.42 | 36 |
| H38  | 1999.9  | 12687.69 | 7435.39 | 21 |
| H40  | -771.47 | 11066.37 | 9427.78 | 22 |
| H41  | -54.49  | 9828.3   | 8664.09 | 20 |
| H42A | 959.72  | 13262.25 | 8912.83 | 36 |
| H42B | -376.6  | 12662.07 | 9608.93 | 36 |
| H42C | -983.54 | 13139.34 | 8709.68 | 36 |

---

## 6. Copies of $^1\text{H}$ and $^{13}\text{C}$ NMR spectra of all products

$^1\text{H}$  NMR (400 MHz) and  $^{13}\text{C}$  NMR (100 MHz) spectra of **2a** ( $\text{DMSO-}d_6$ )

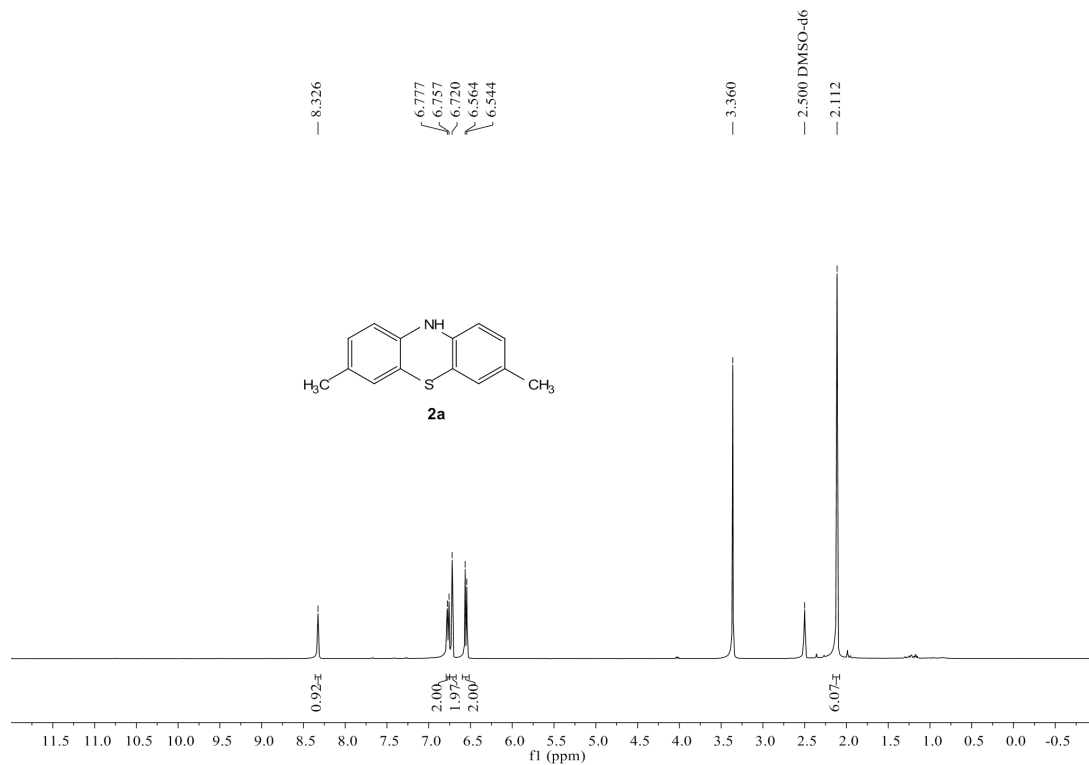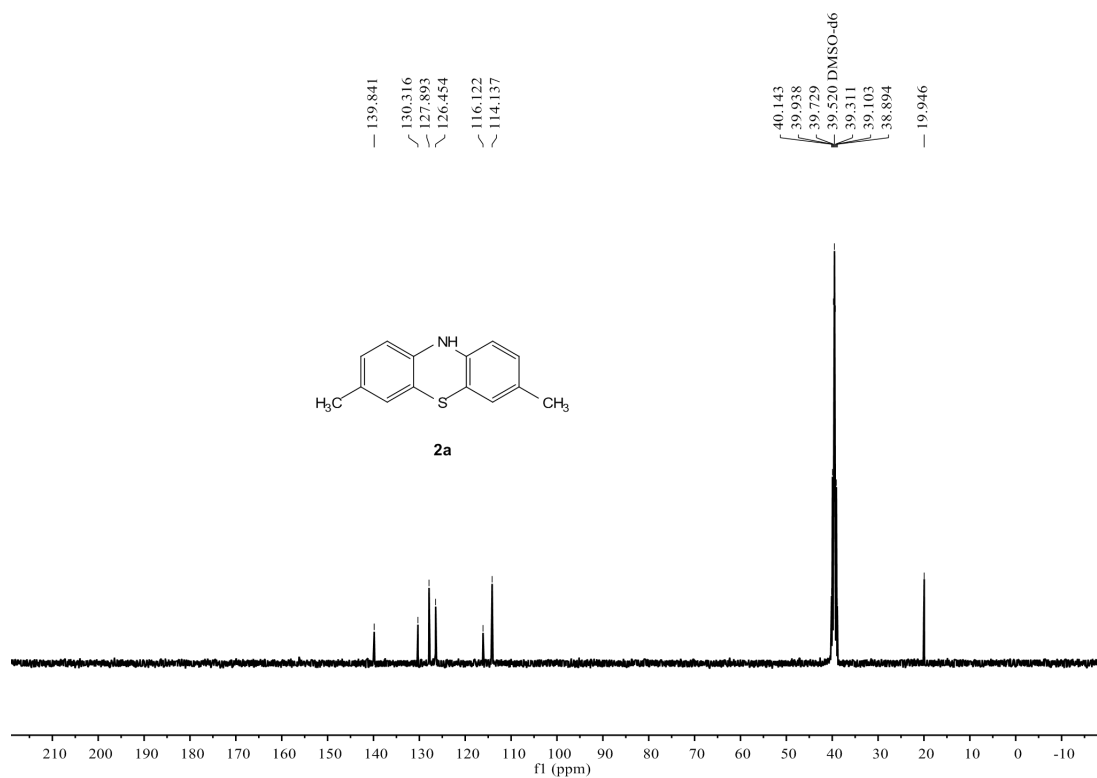

$^1\text{H}$  NMR (400 MHz) and  $^{13}\text{C}$  NMR (100 MHz) spectra of **2b** (Acetone- $d_6$ )

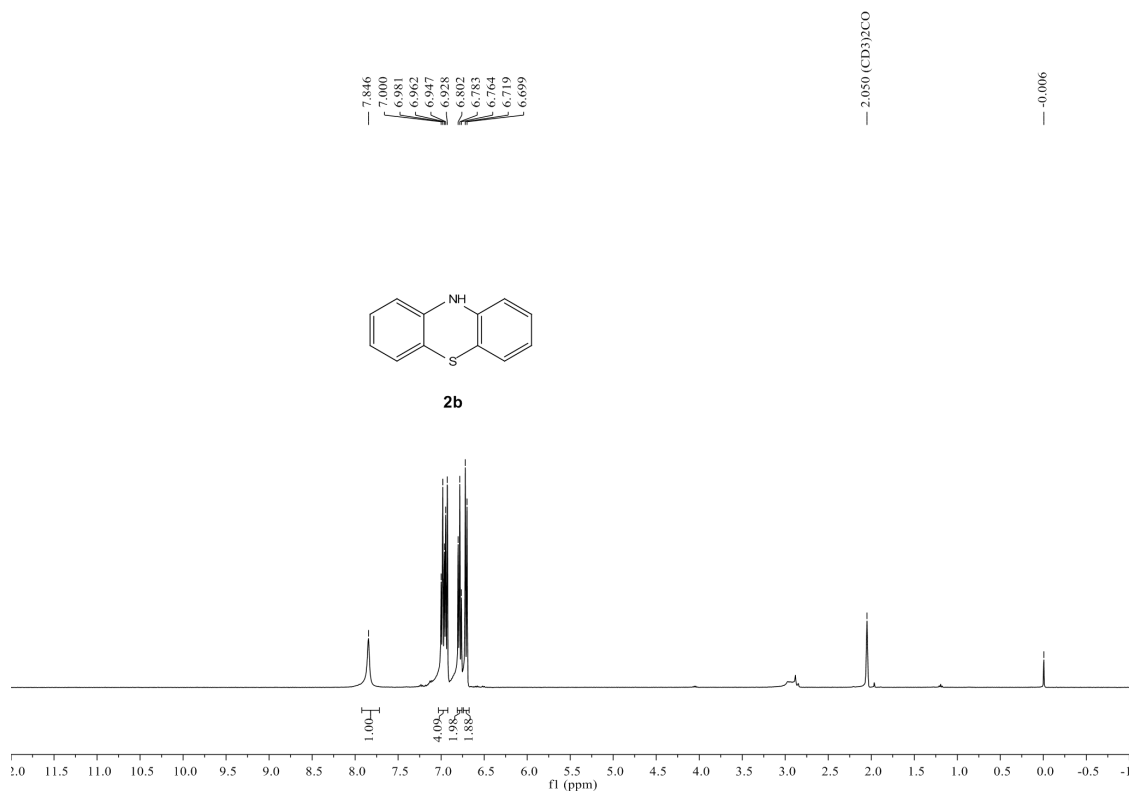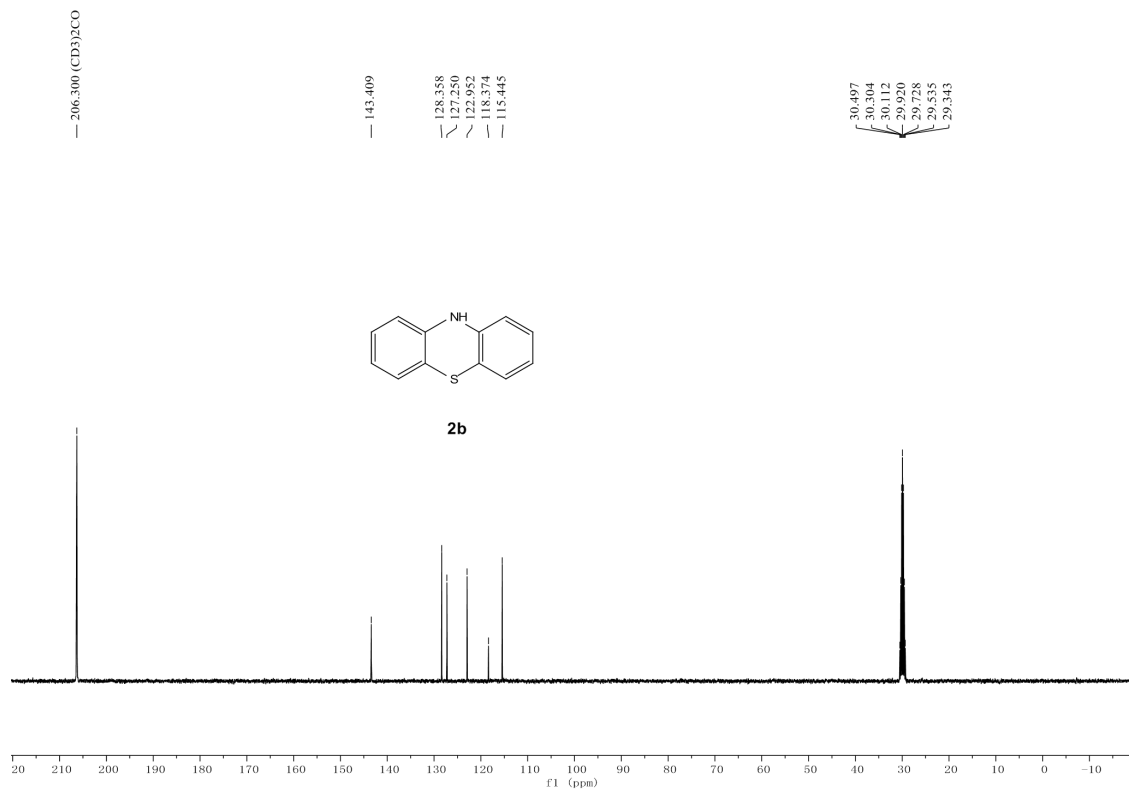

$^1\text{H}$  NMR (400 MHz) and  $^{13}\text{C}$  NMR (100 MHz) spectra of **2c** (Acetone- $d_6$ )

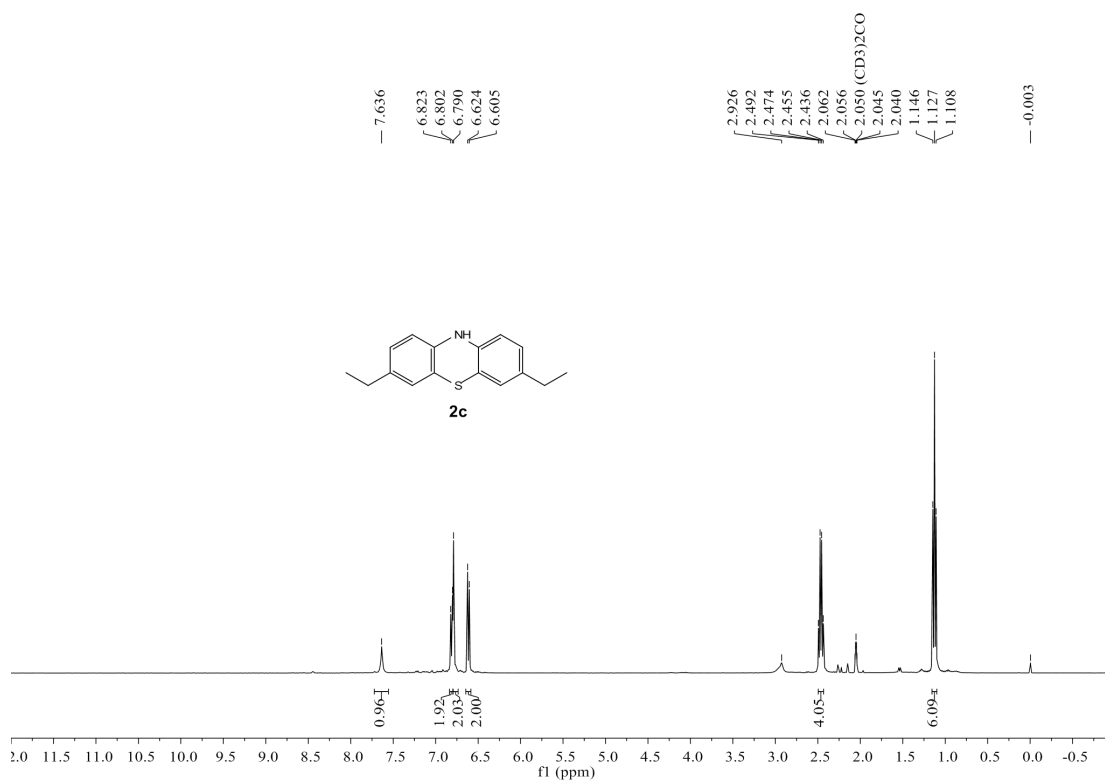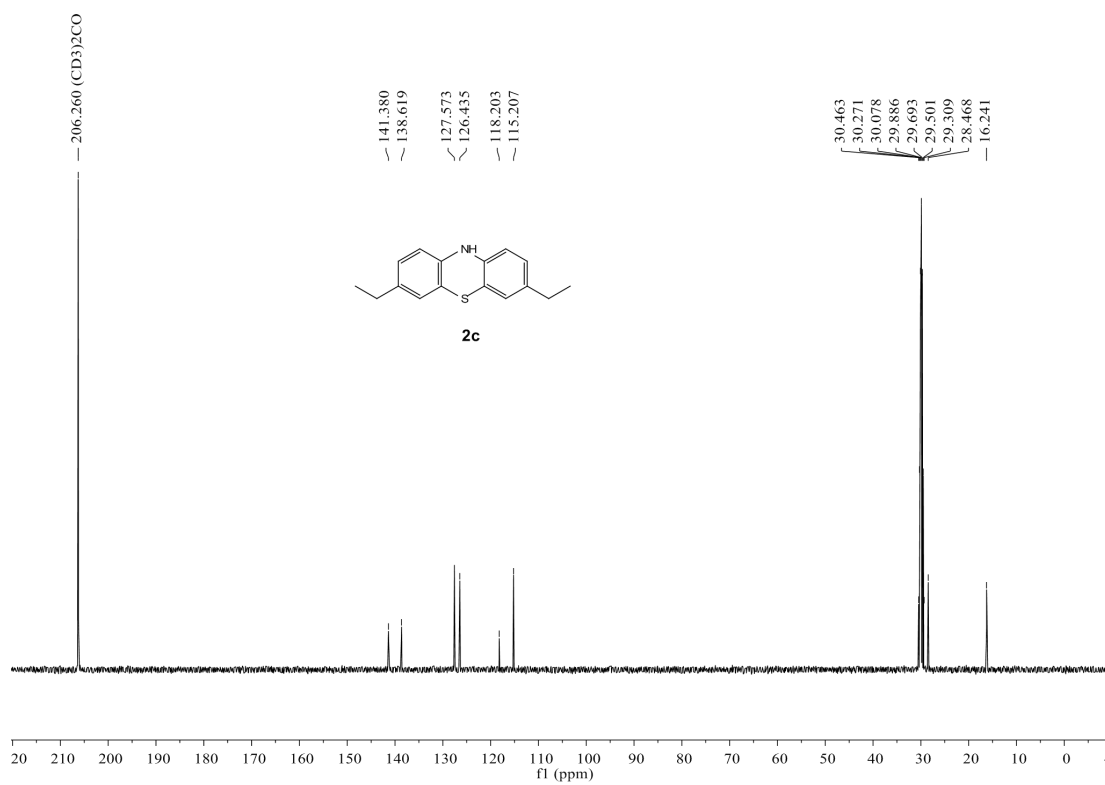

$^1\text{H}$  NMR (400 MHz) and  $^{13}\text{C}$  NMR (100 MHz) spectra of **2d** (Acetone- $d_6$ )

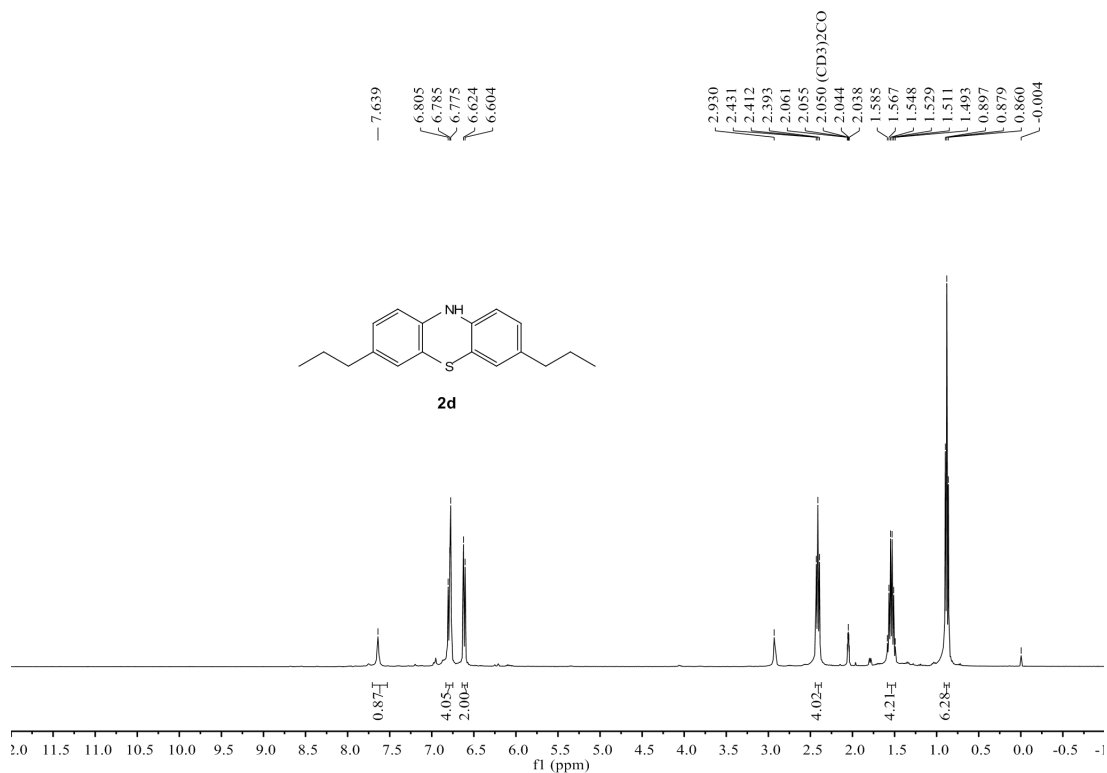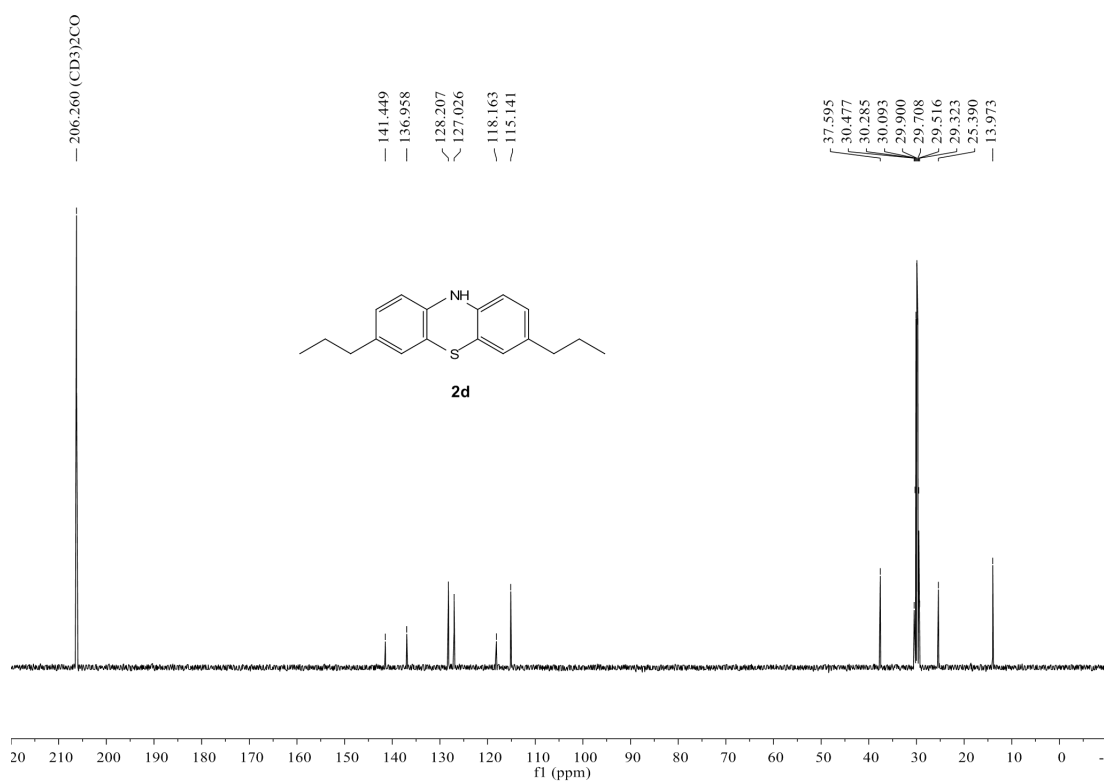

$^1\text{H}$  NMR (400 MHz) and  $^{13}\text{C}$  NMR (100 MHz) spectra of **2e** (Acetone- $d_6$ )

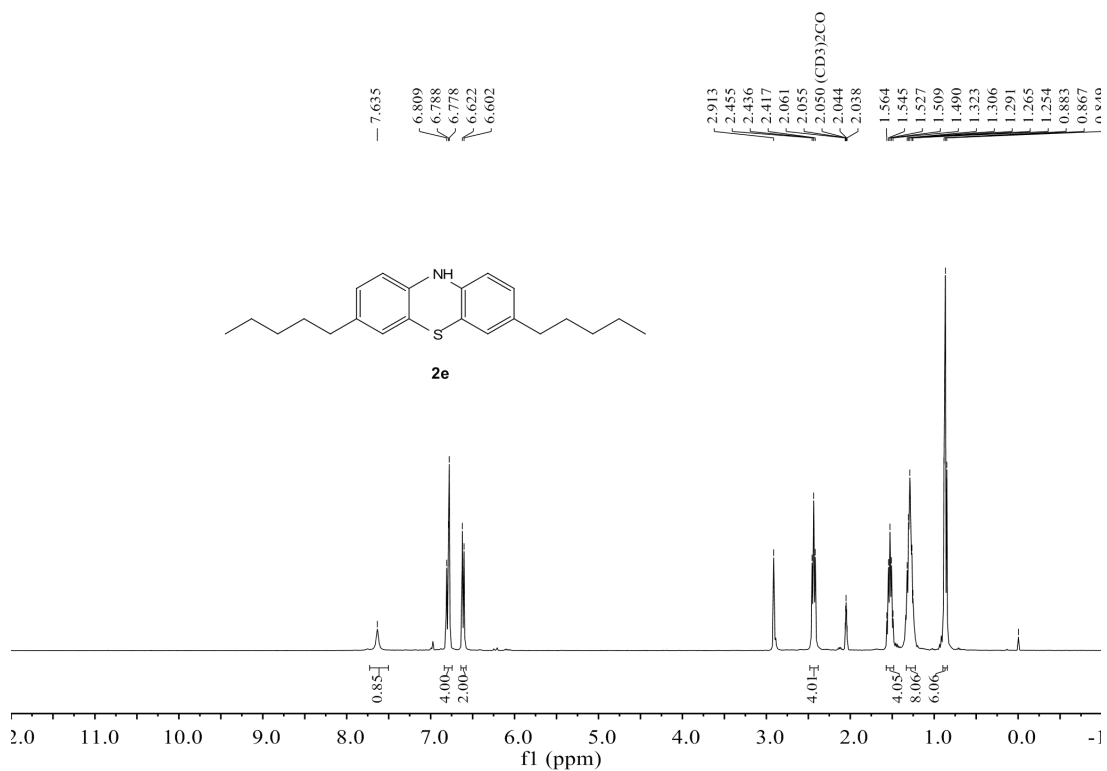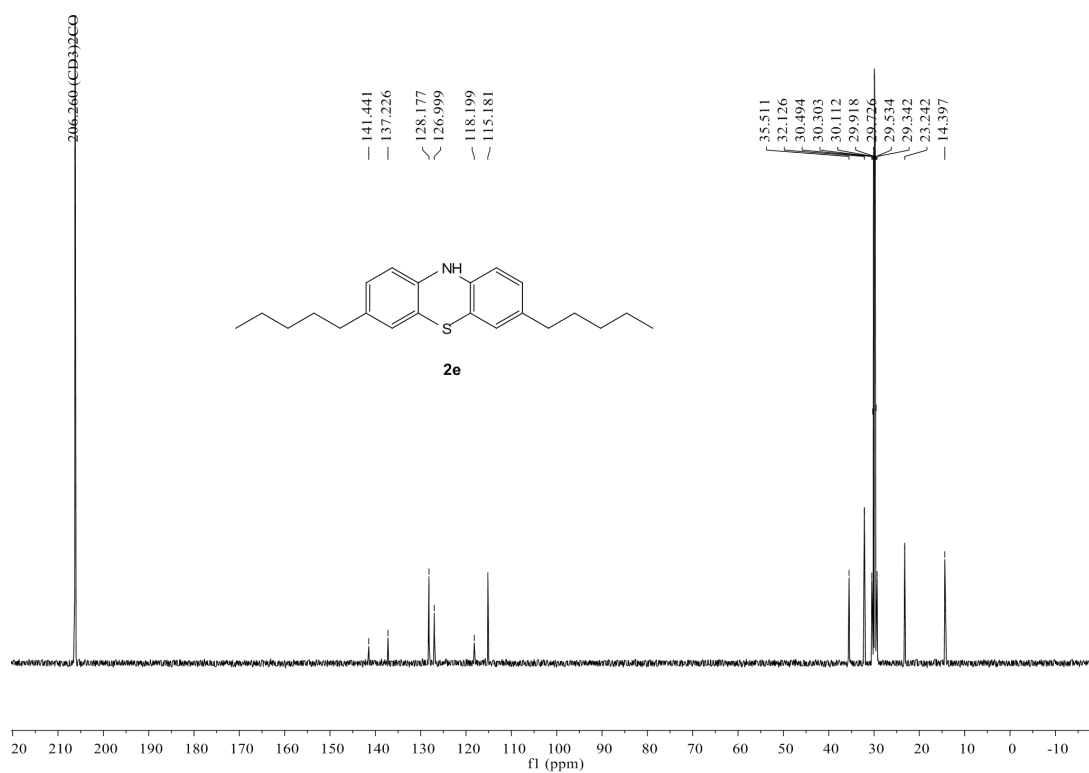

$^1\text{H}$  NMR (400 MHz) and  $^{13}\text{C}$  NMR (100 MHz) spectra of **2f** (Acetone- $d_6$ )

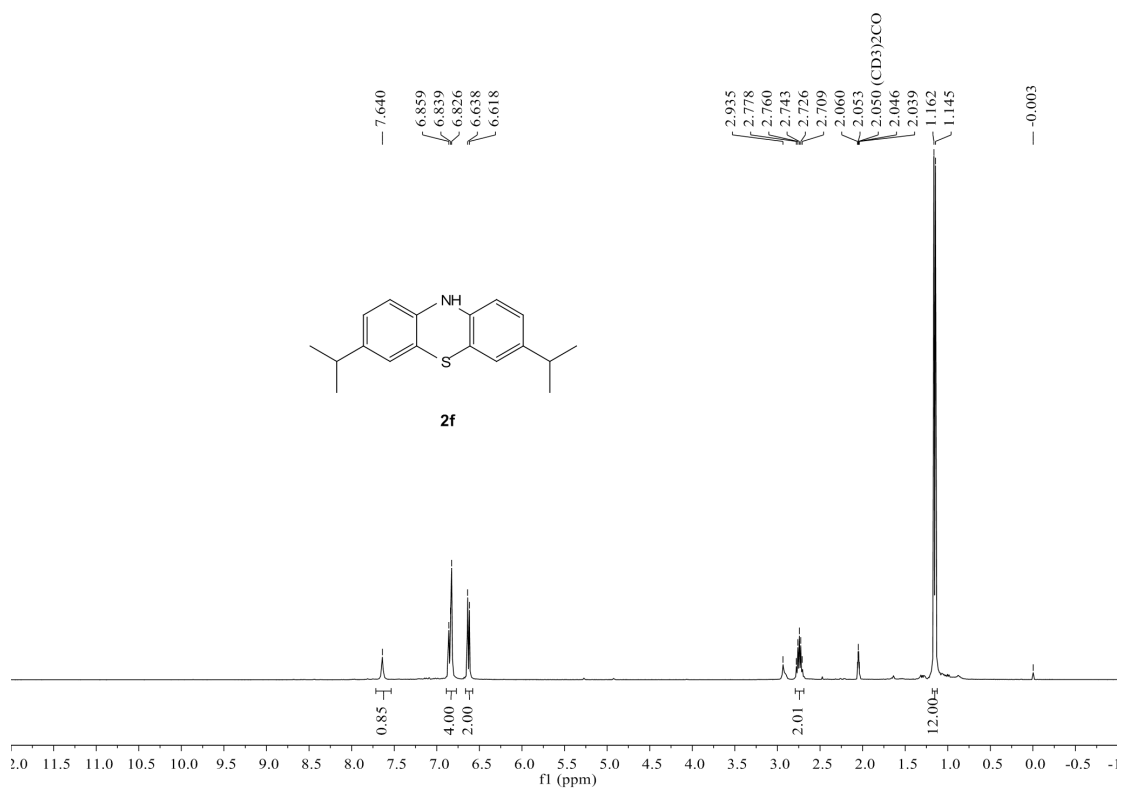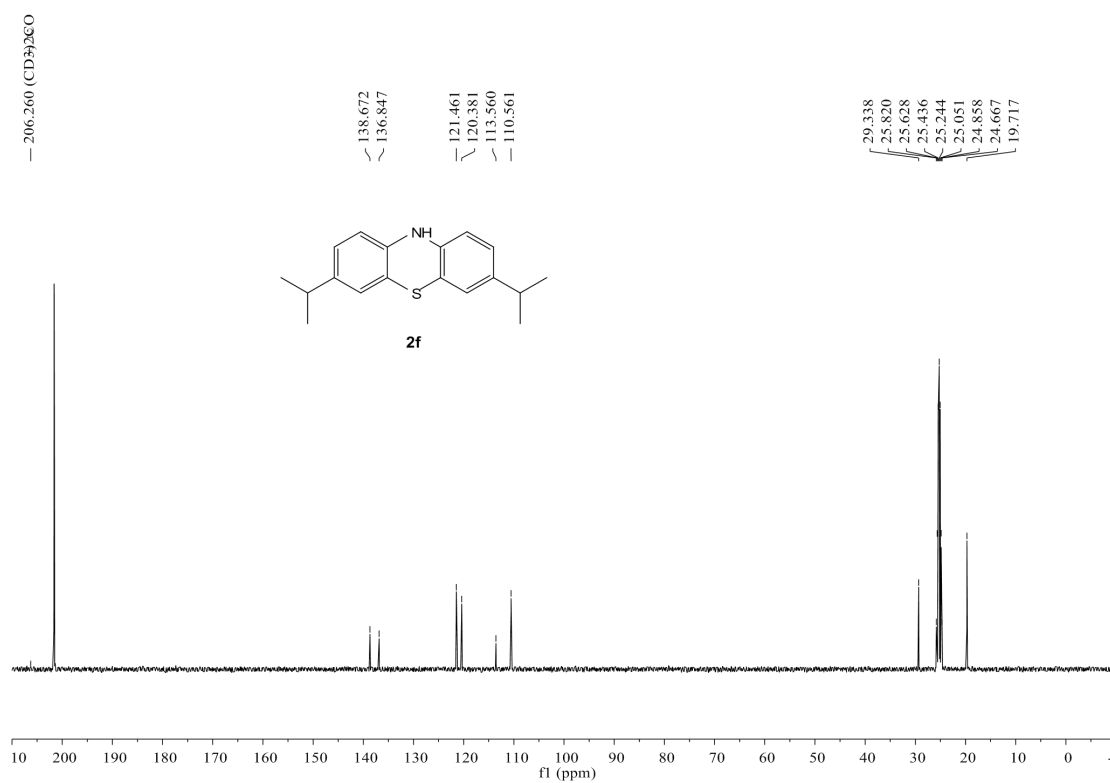

$^1\text{H}$  NMR (400 MHz) and  $^{13}\text{C}$  NMR (100 MHz) spectra of **2g** (Acetone- $d_6$ )

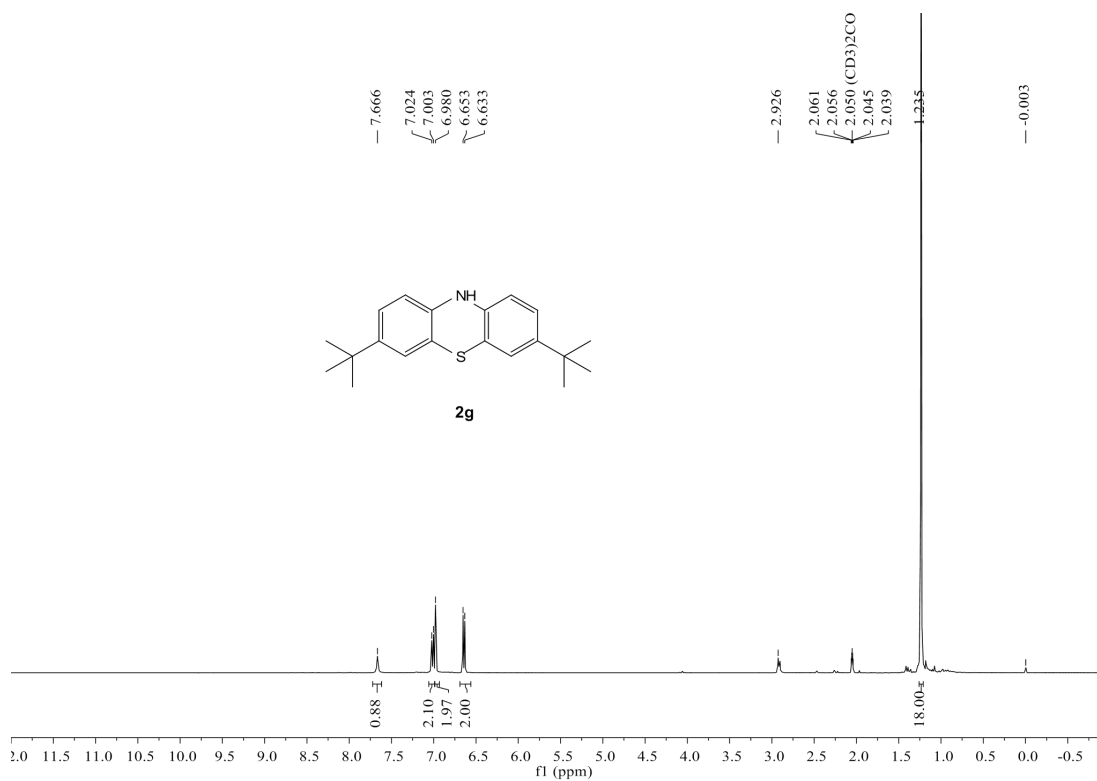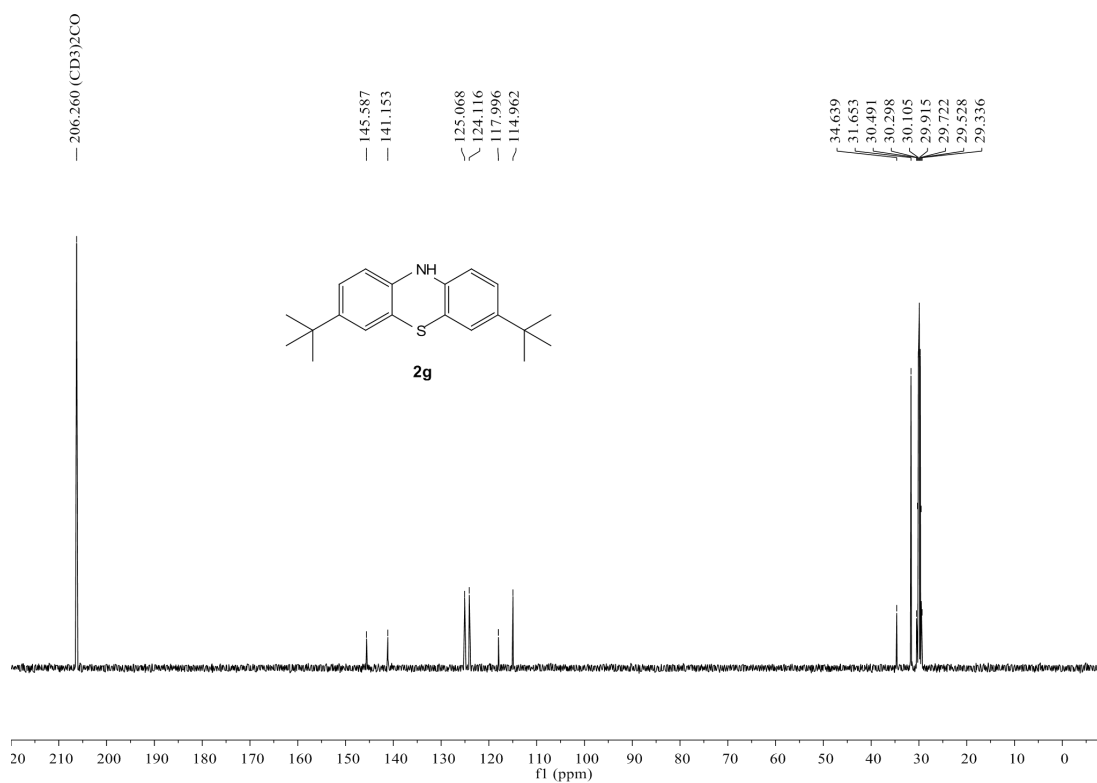



$^1\text{H}$  NMR (400 MHz) and  $^{13}\text{C}$  NMR (100 MHz) spectra of **2h** (Acetone- $d_6$ )

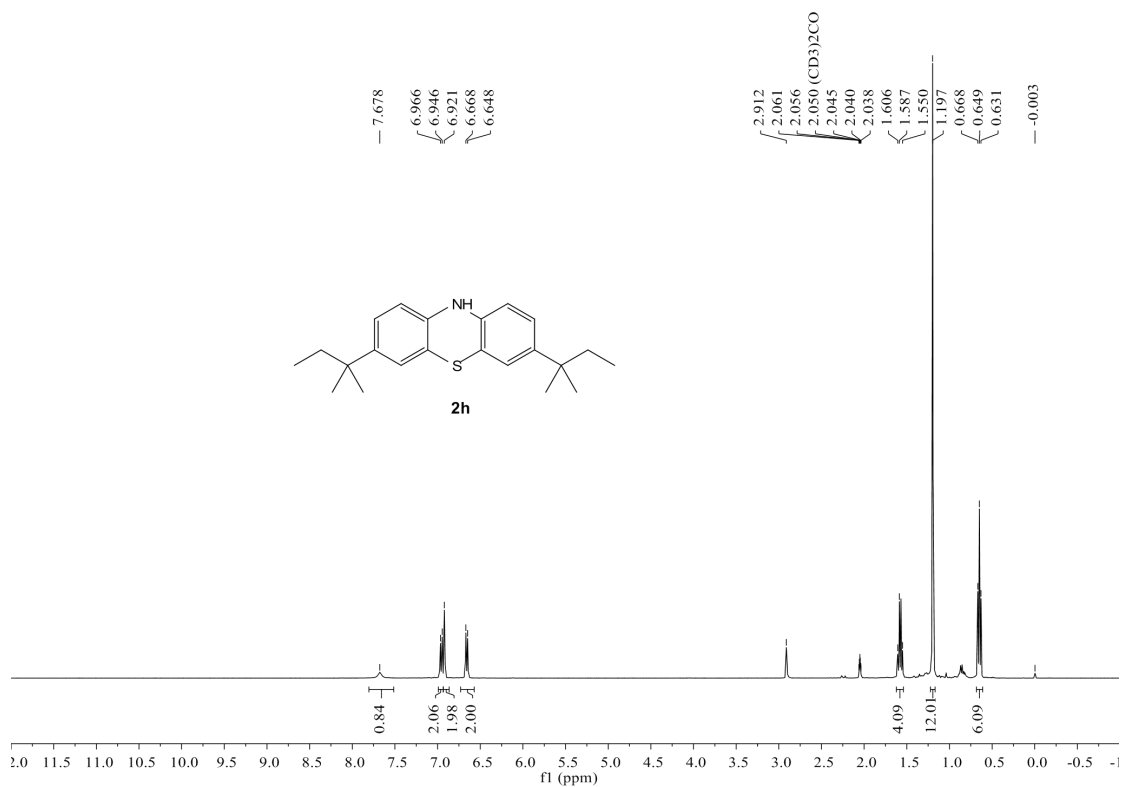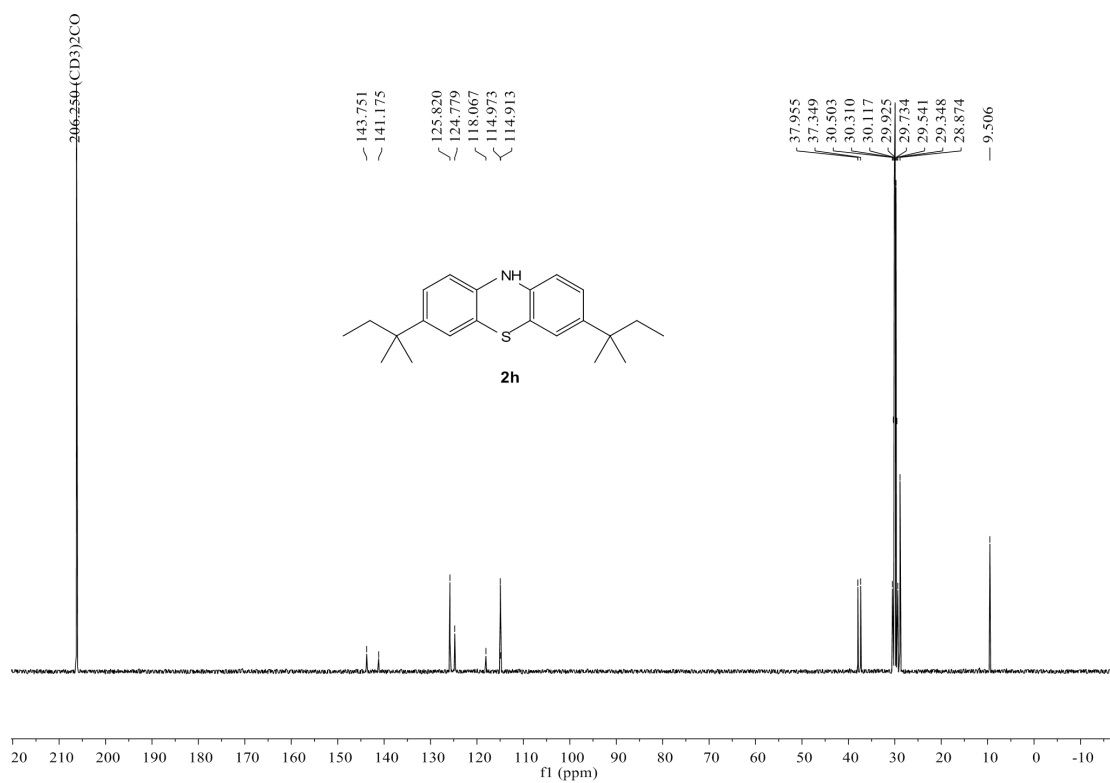

$^1\text{H}$  NMR (400 MHz) and  $^{13}\text{C}$  NMR (100 MHz) spectra of **2i** ( $\text{DMSO-}d_6$ )

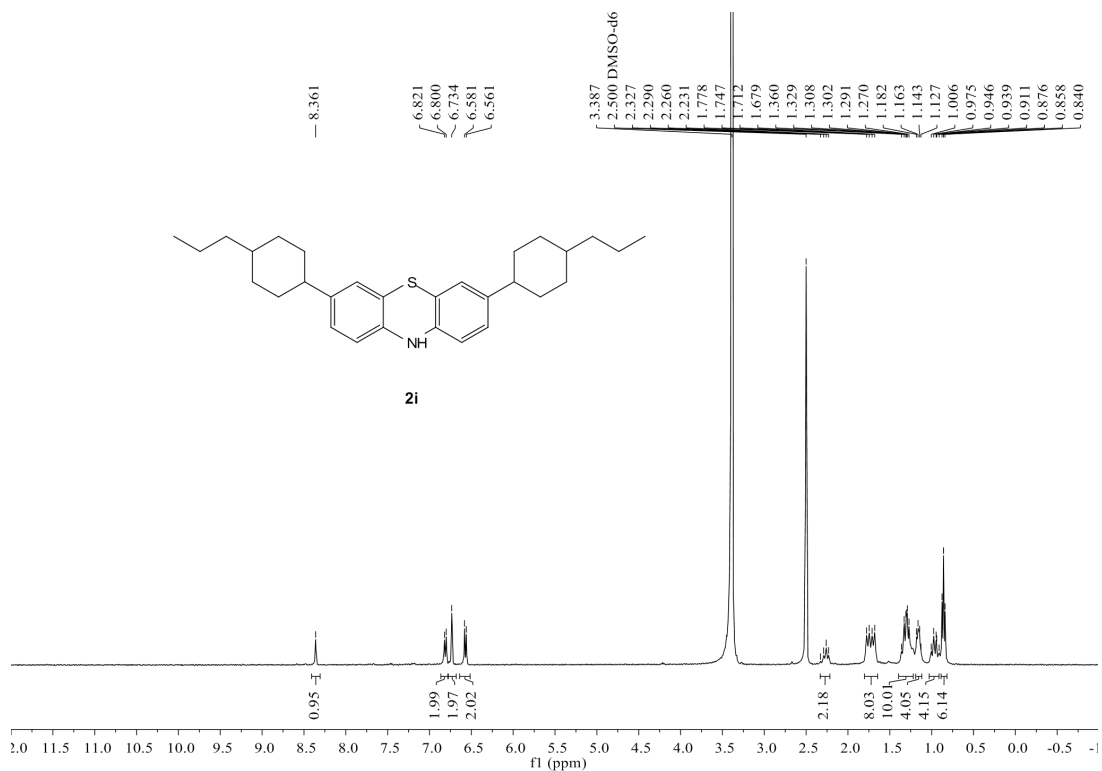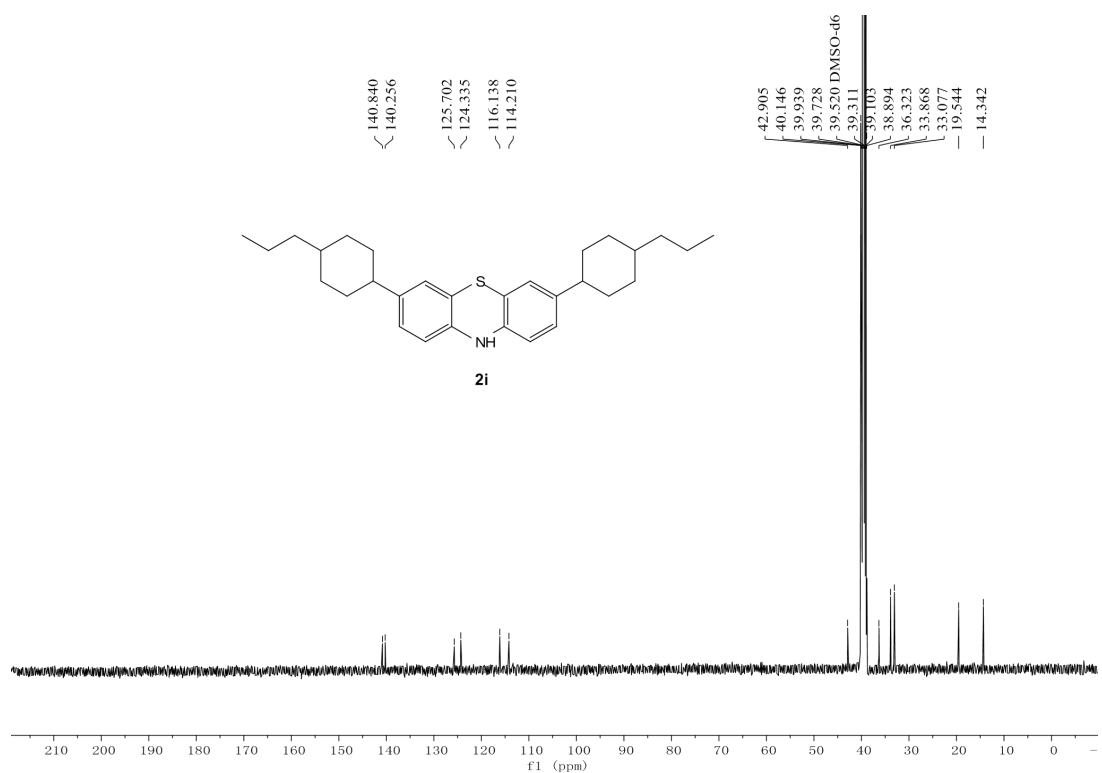

$^1\text{H}$  NMR (400 MHz) and  $^{13}\text{C}$  NMR (100 MHz) spectra of **2j** (Acetone- $d_6$ )

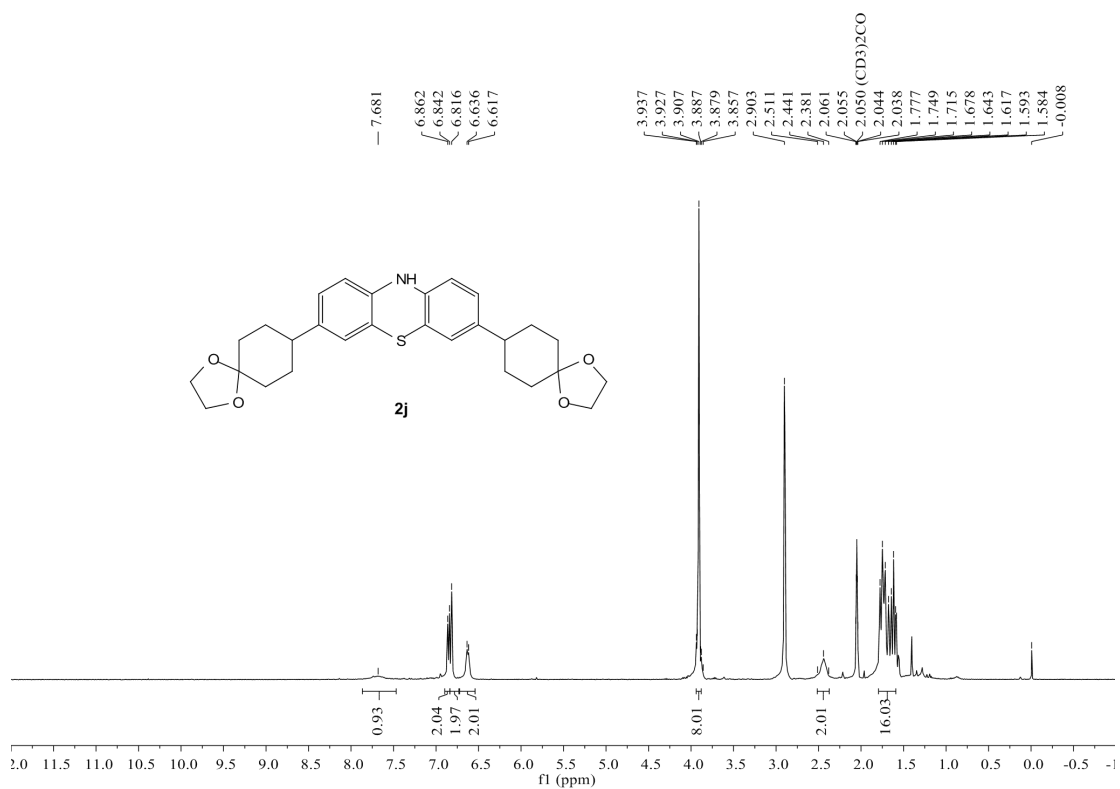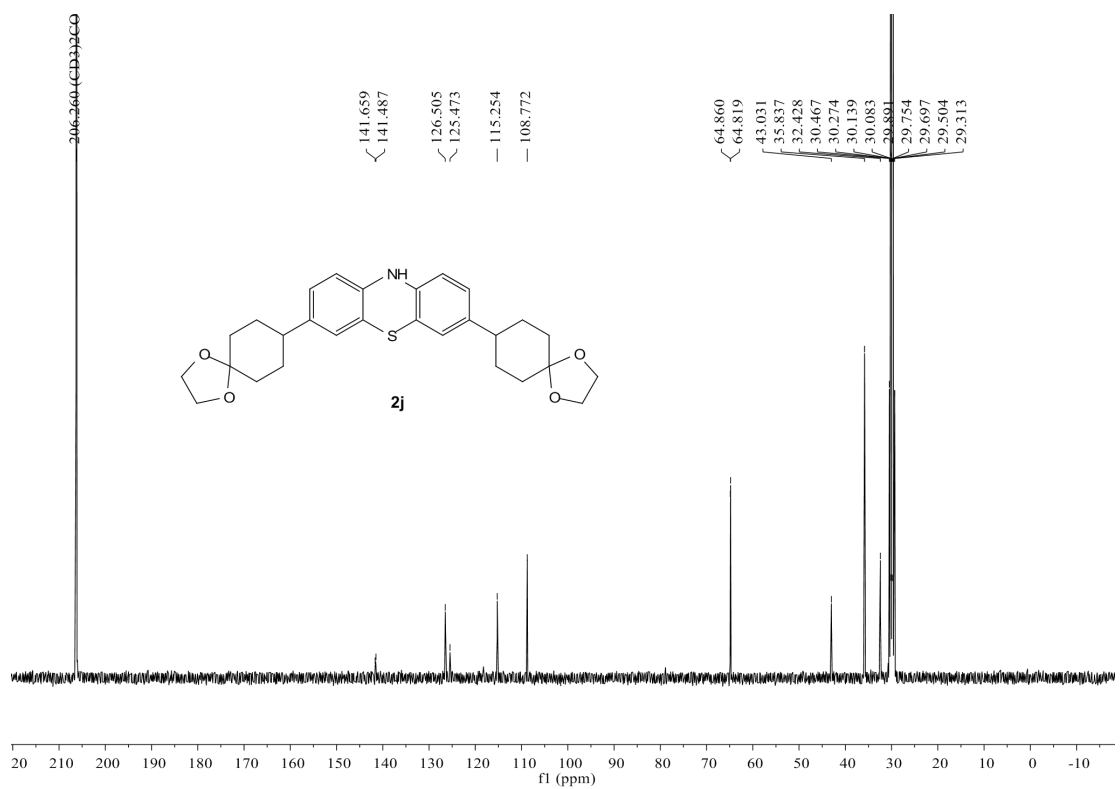

$^1\text{H}$  NMR (400 MHz) and  $^{13}\text{C}$  NMR (100 MHz) spectra of **21** (DMSO- $d_6$ )

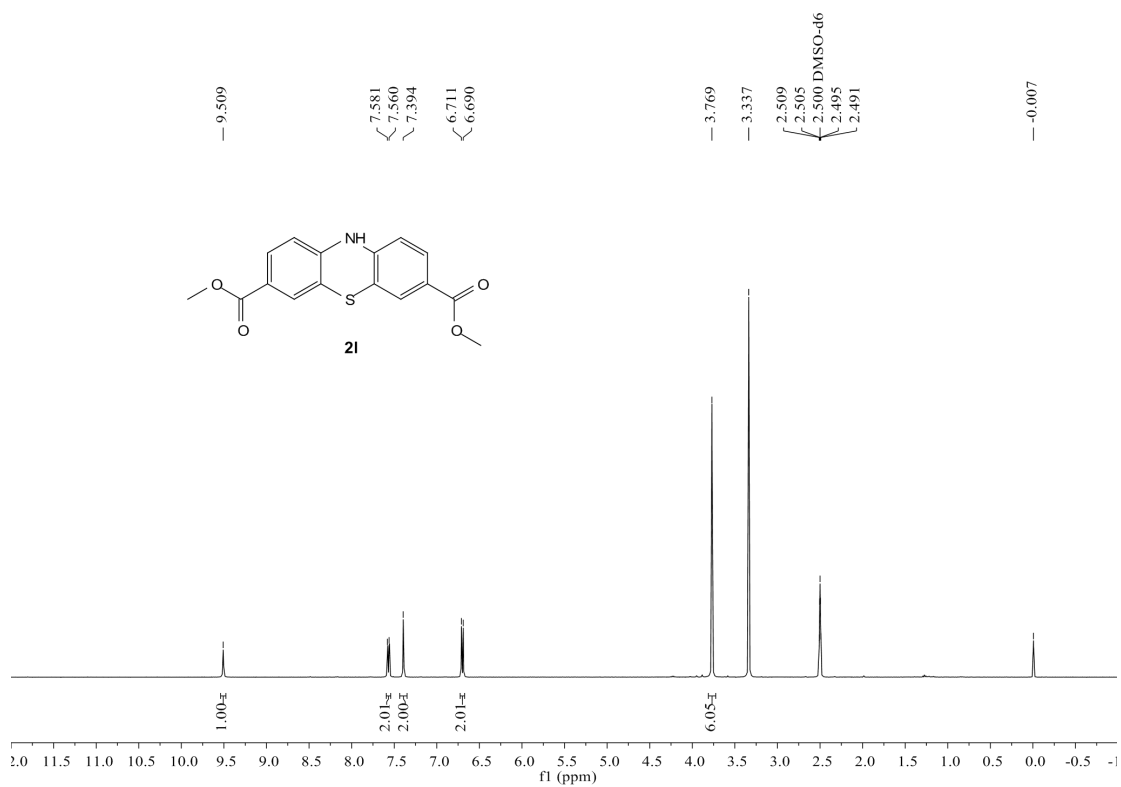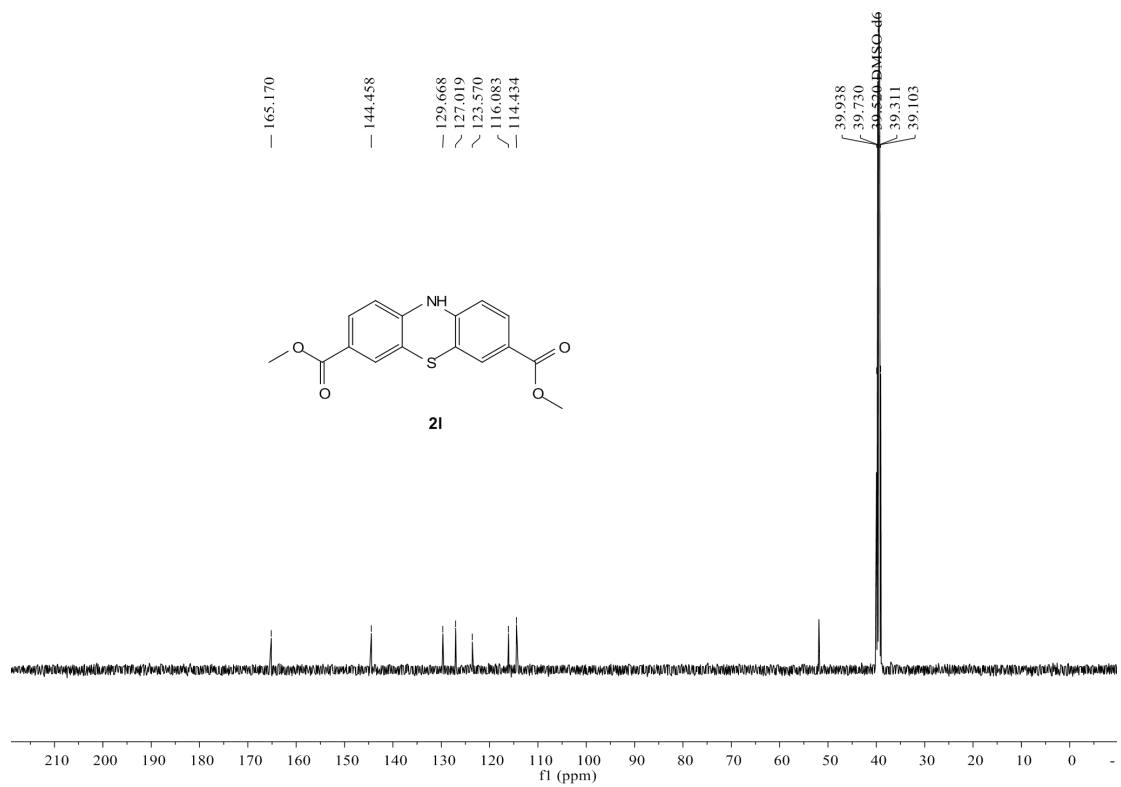

$^1\text{H}$  NMR (400 MHz) and  $^{13}\text{C}$  NMR (100 MHz) spectra of **2m** ( $\text{DMSO-}d_6$ )

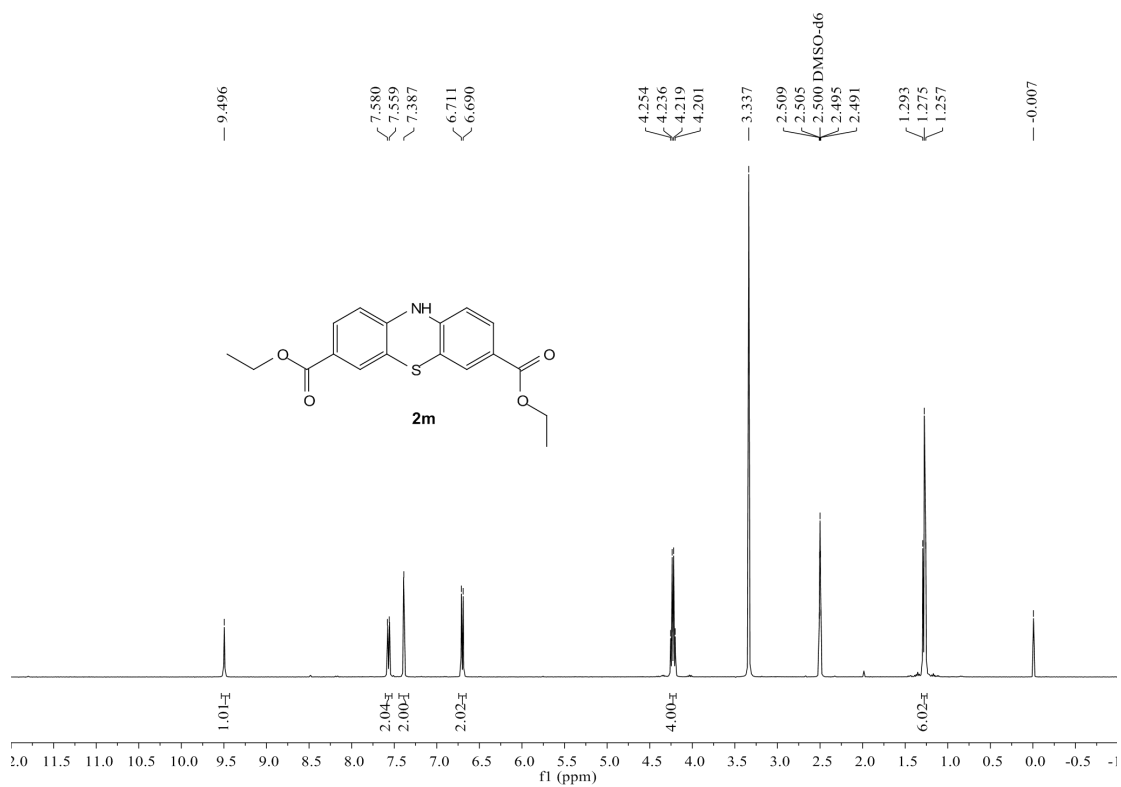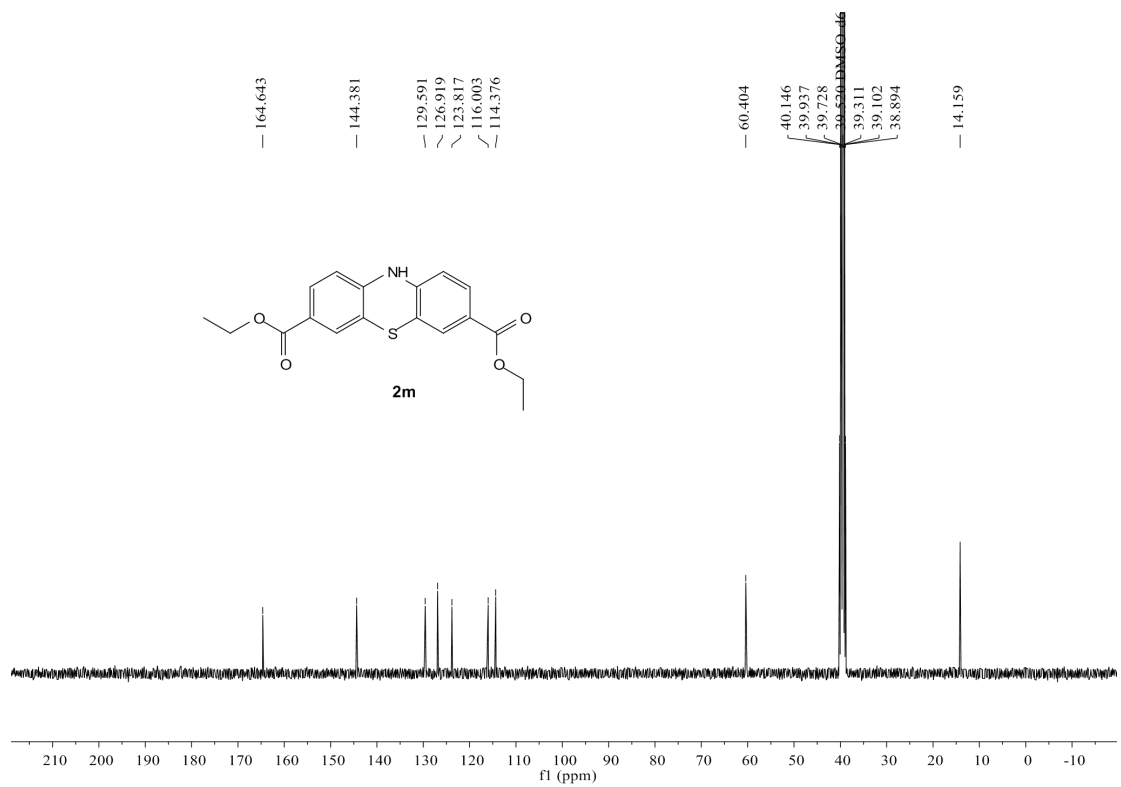

$^1\text{H}$  NMR (400 MHz) and  $^{13}\text{C}$  NMR (100 MHz) spectra of **2n** ( $\text{DMSO-}d_6$ )

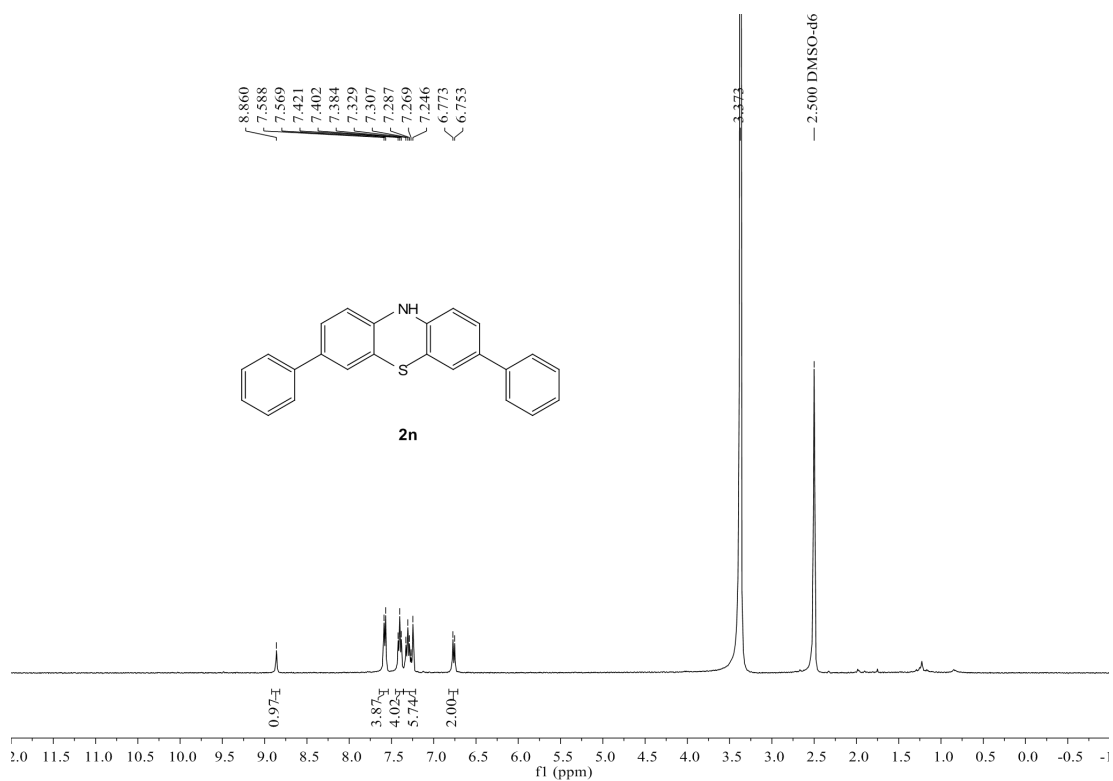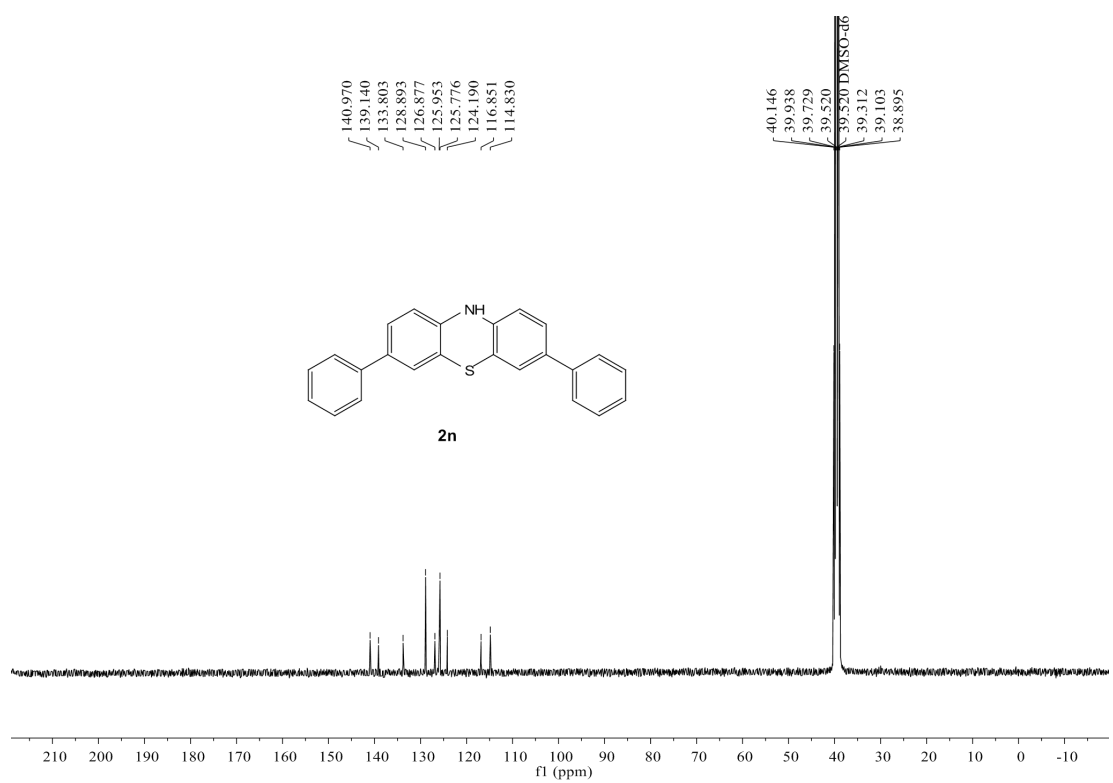

$^1\text{H}$  NMR (400 MHz) and  $^{13}\text{C}$  NMR (100 MHz) spectra of **2o** ( $\text{DMSO-}d_6$ )

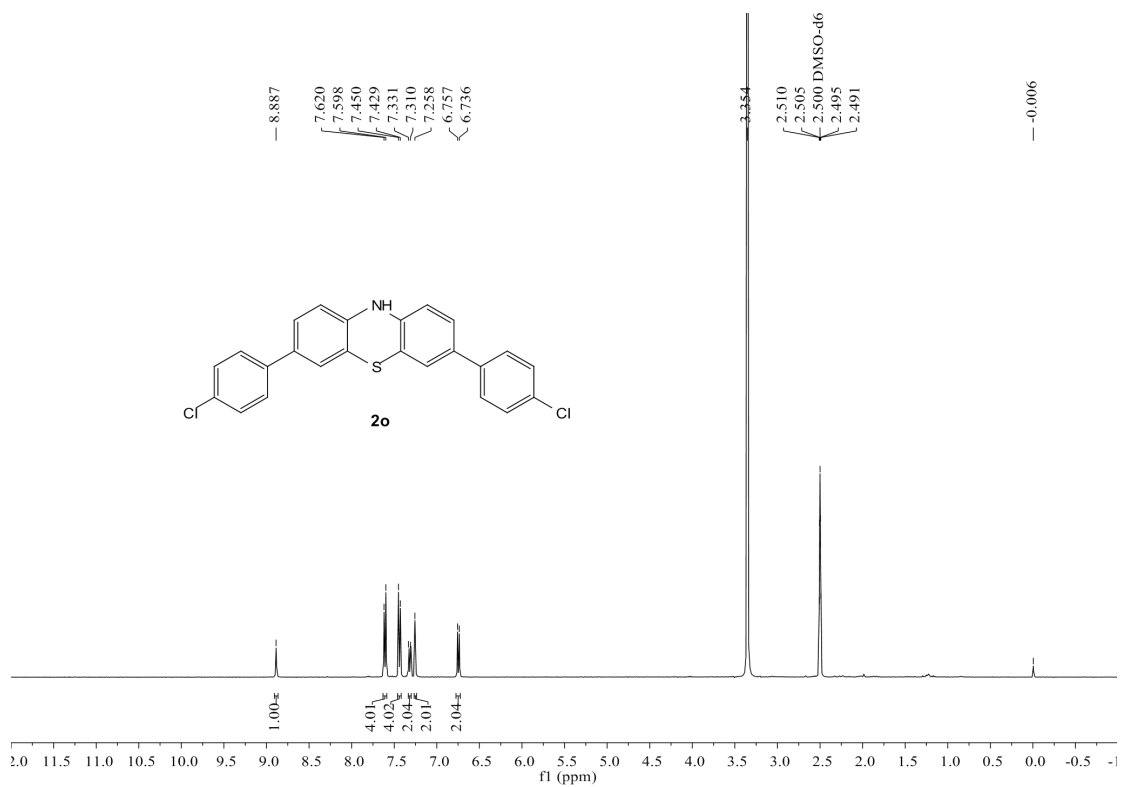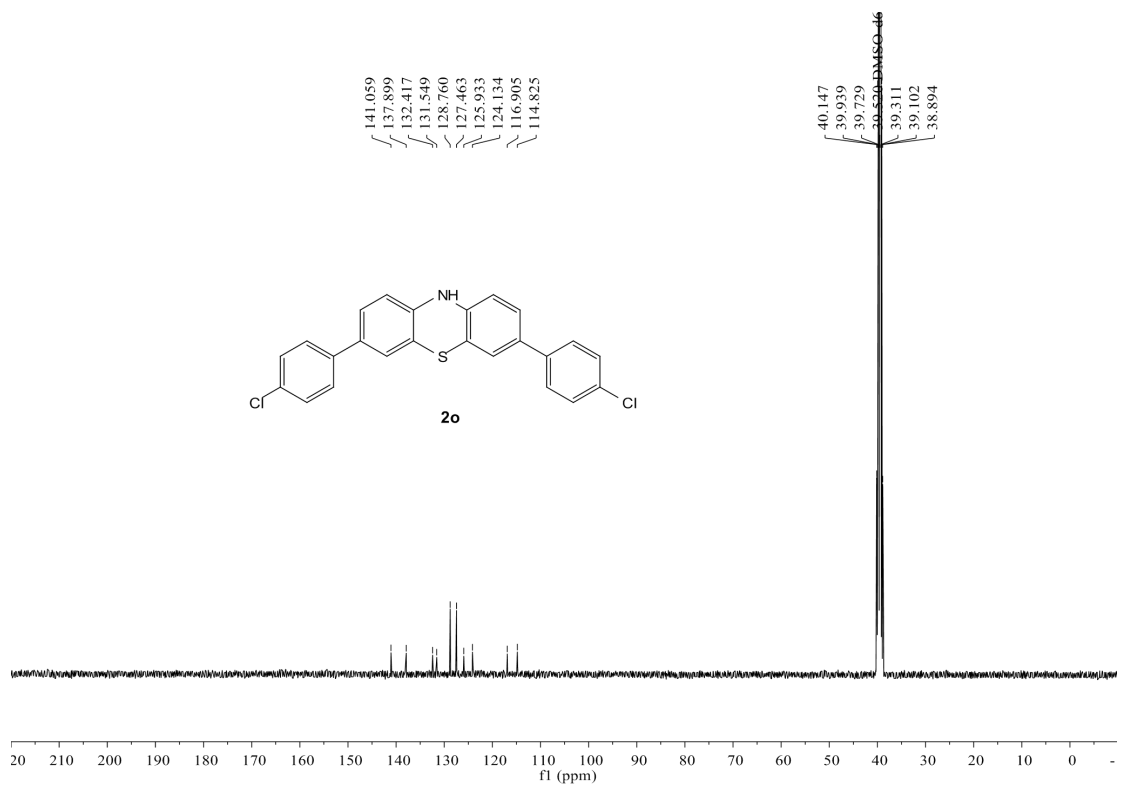

$^1\text{H}$  NMR (400 MHz,  $\text{DMSO-}d_6$ ) and  $^{13}\text{C}$  NMR (100 MHz,  $\text{Acetone-}d_6$ ) spectra of **2q**

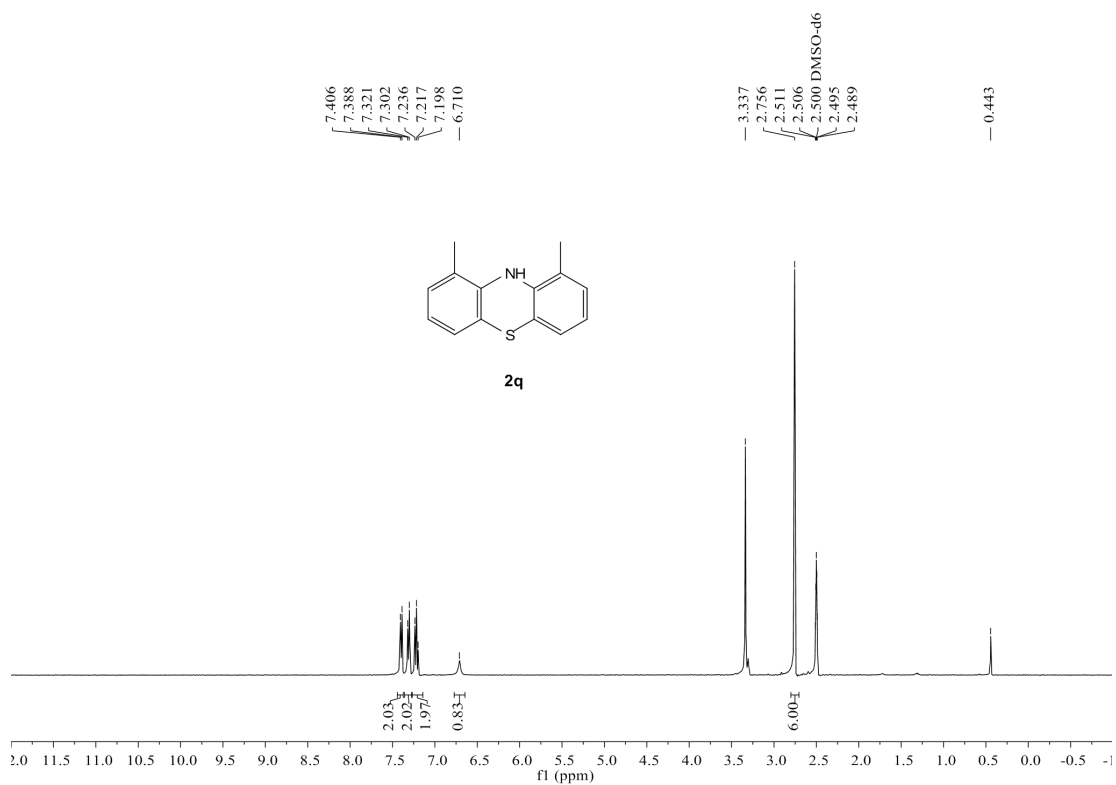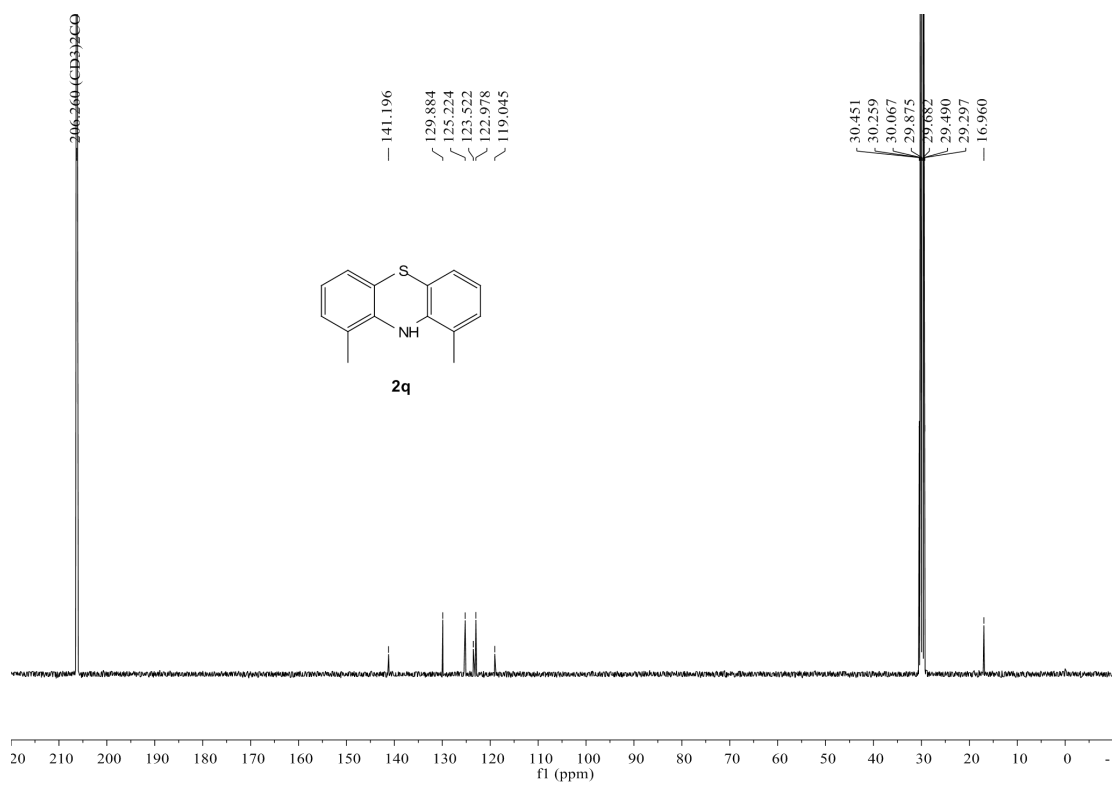



$^1\text{H}$  NMR (400 MHz) and  $^{13}\text{C}$  NMR (100 MHz) spectra of **3a** ( $\text{CDCl}_3$ )

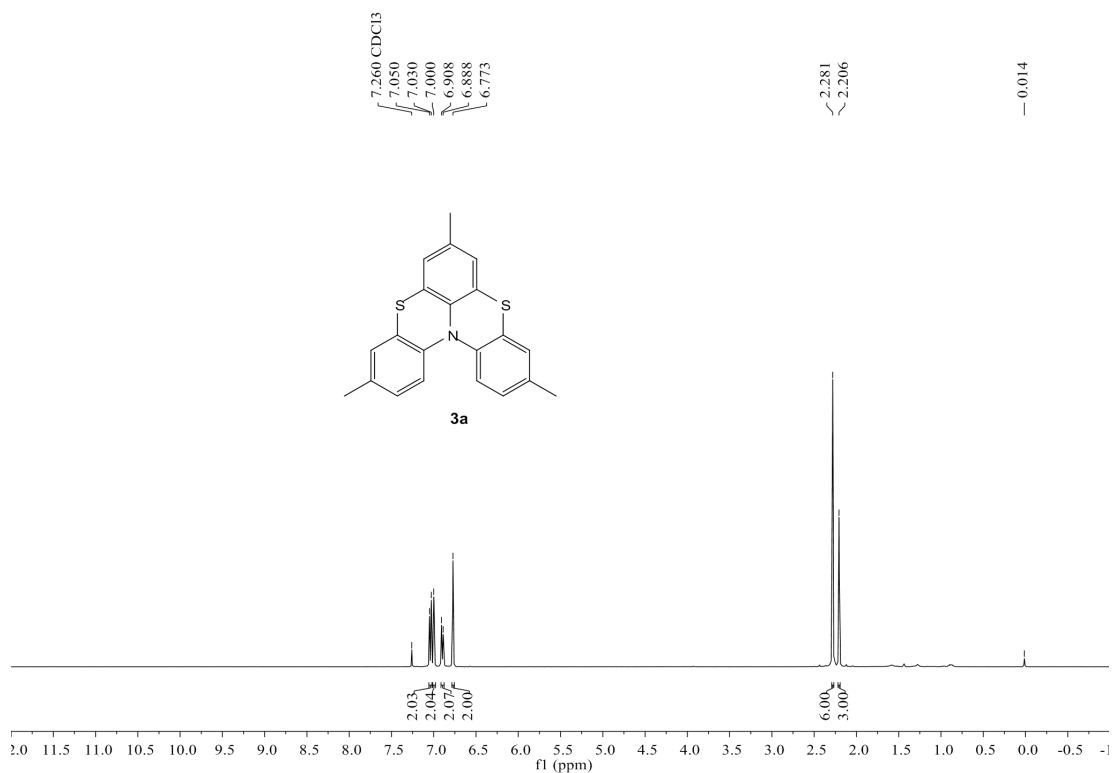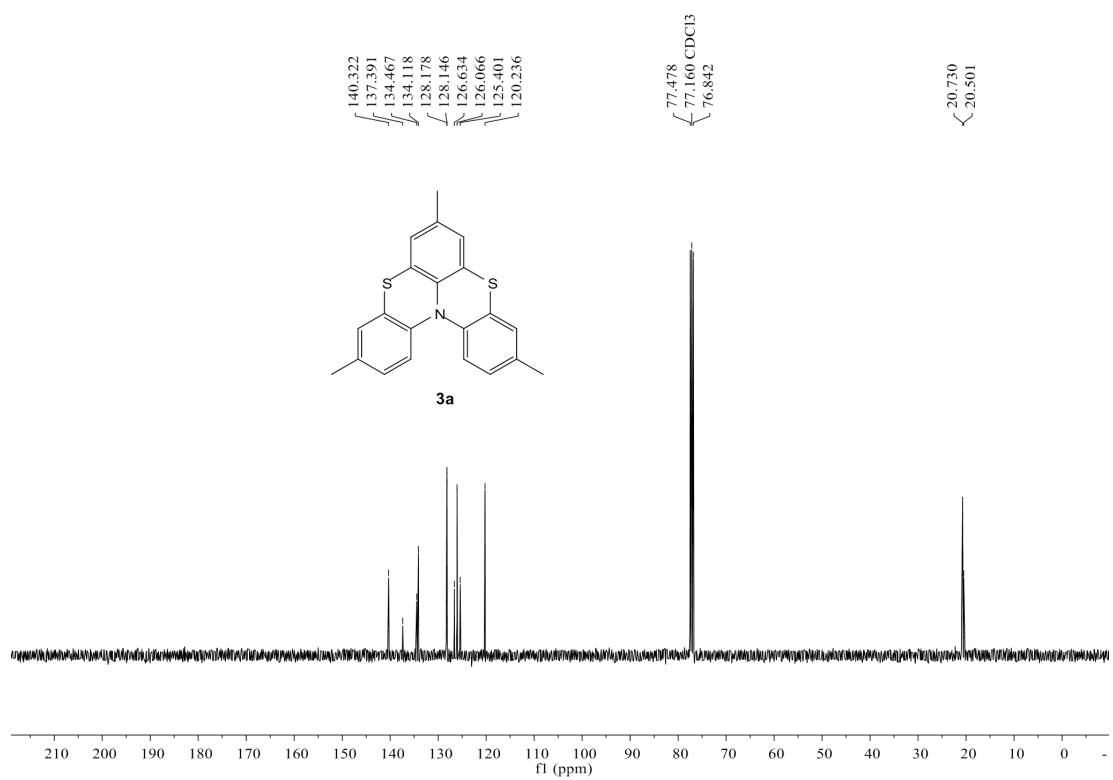

$^1\text{H}$  NMR (400 MHz) and  $^{13}\text{C}$  NMR (100 MHz) spectra of **3b** ( $\text{CDCl}_3$ )

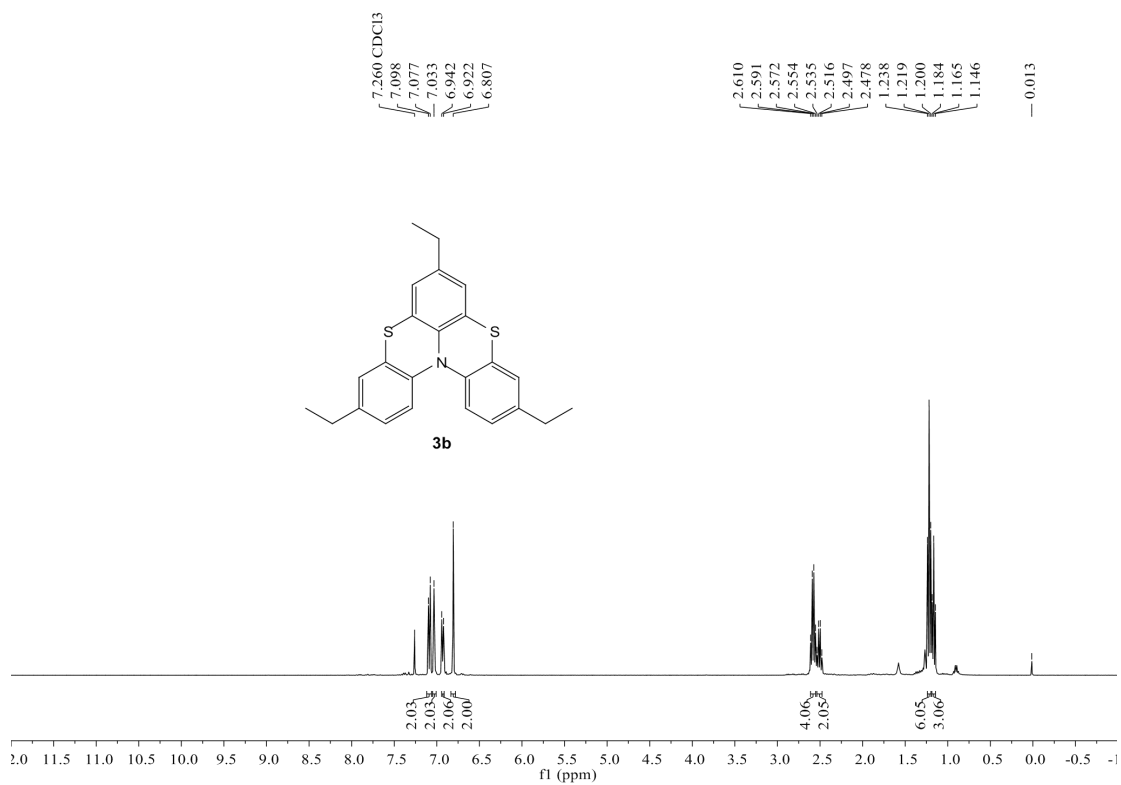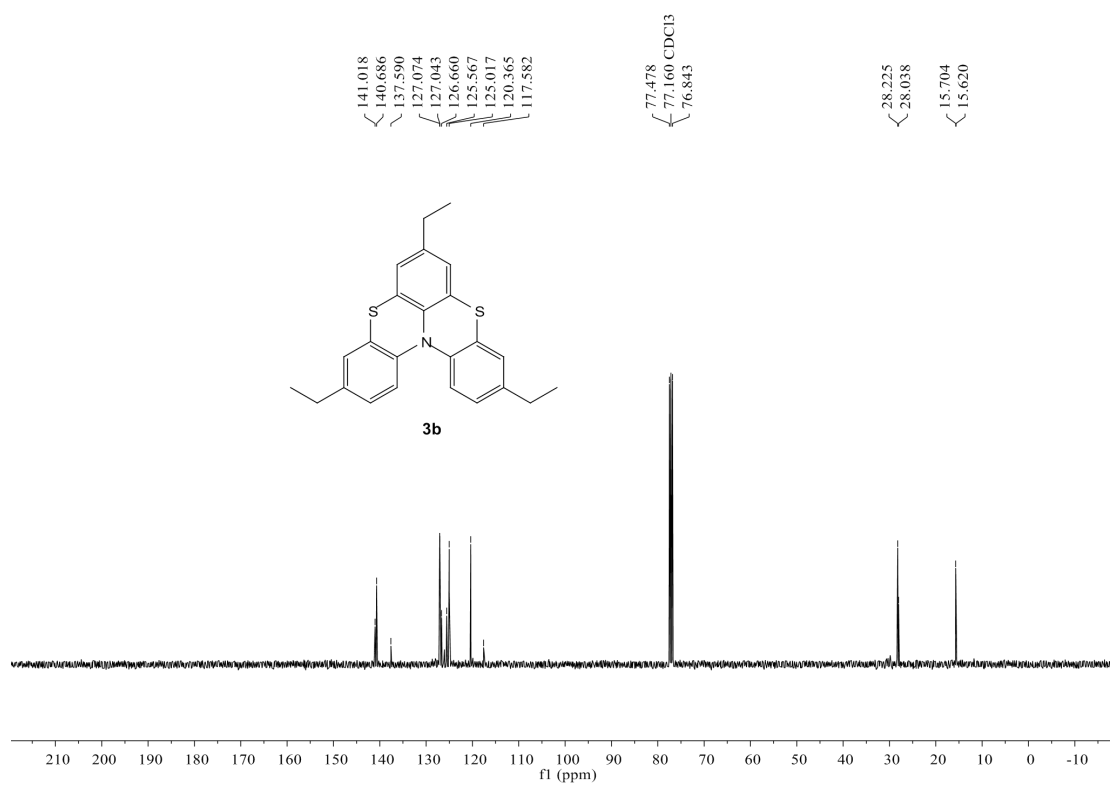

$^1\text{H}$  NMR (400 MHz) and  $^{13}\text{C}$  NMR (100 MHz) spectra of **3c** ( $\text{CDCl}_3$ )

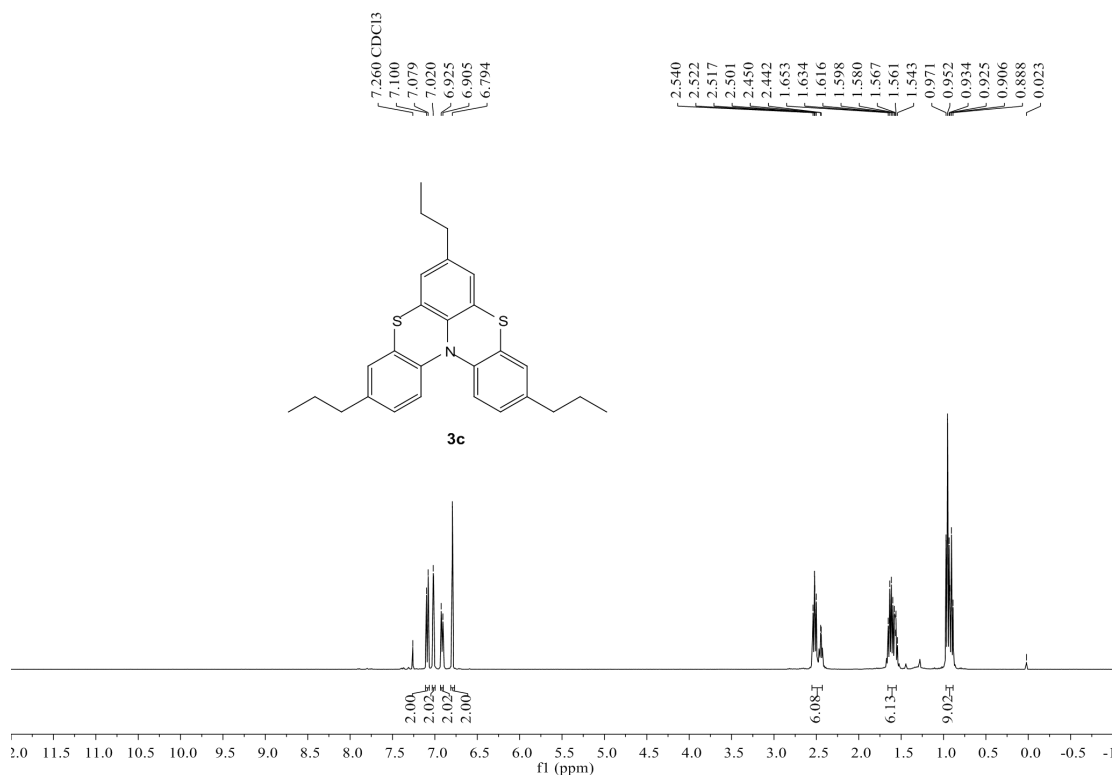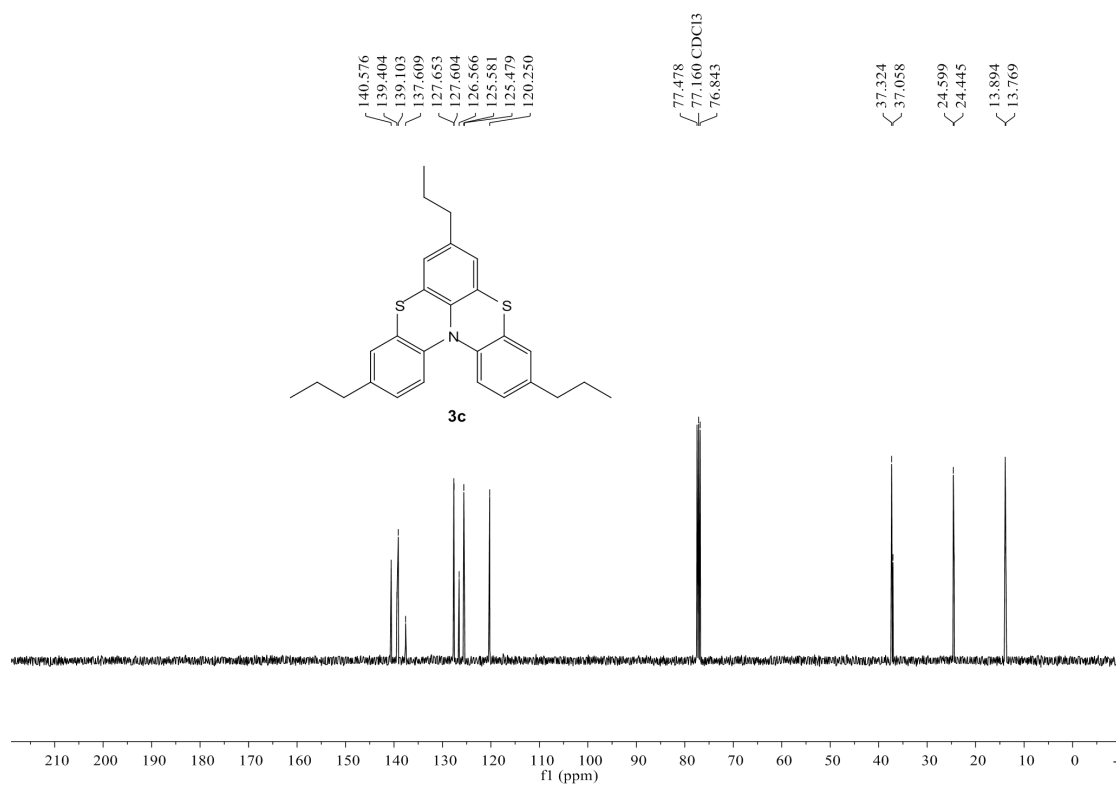

$^1\text{H}$  NMR (400 MHz) and  $^{13}\text{C}$  NMR (100 MHz) spectra of **3d** ( $\text{CDCl}_3\text{-d}_6$ )

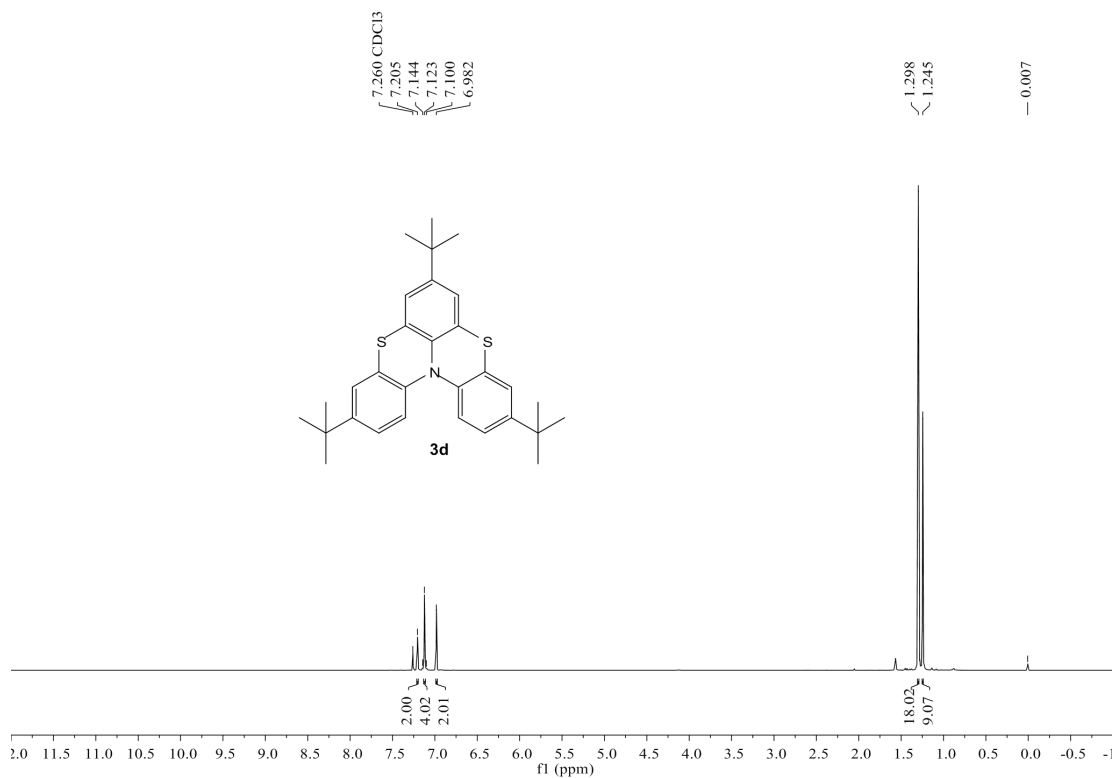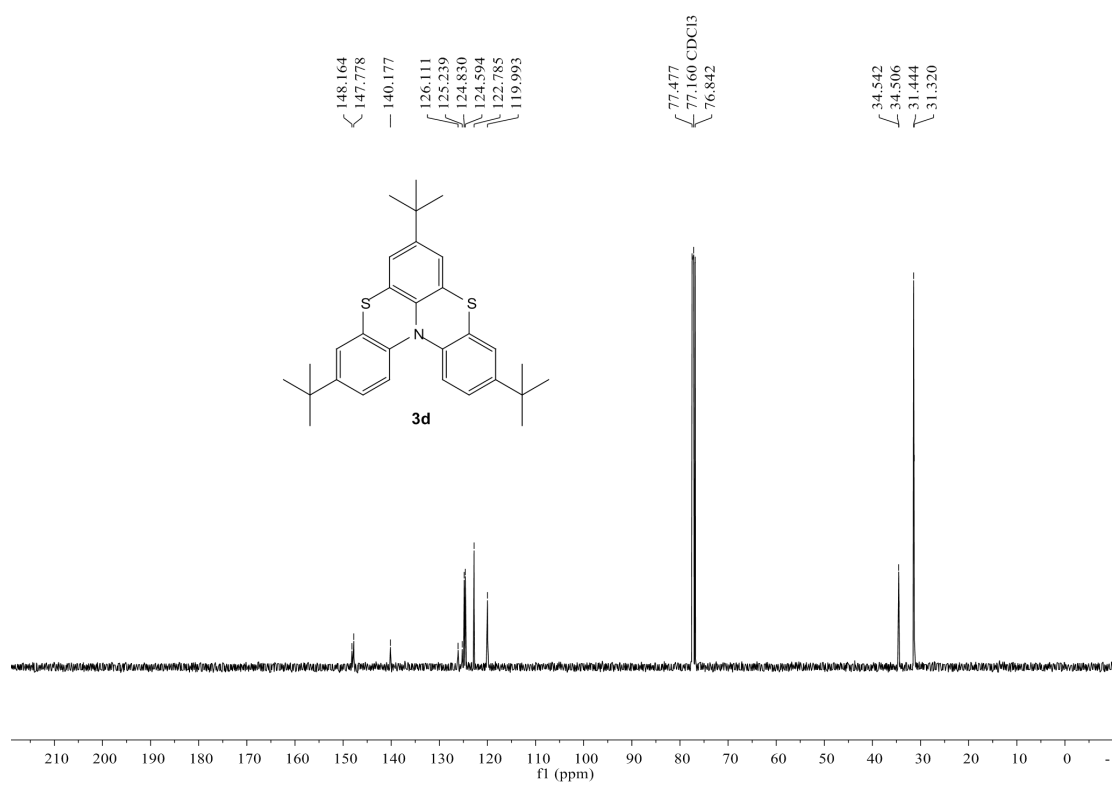

$^1\text{H}$  NMR (400 MHz) and  $^{13}\text{C}$  NMR (100 MHz) spectra of **3e** ( $\text{CDCl}_3$ )

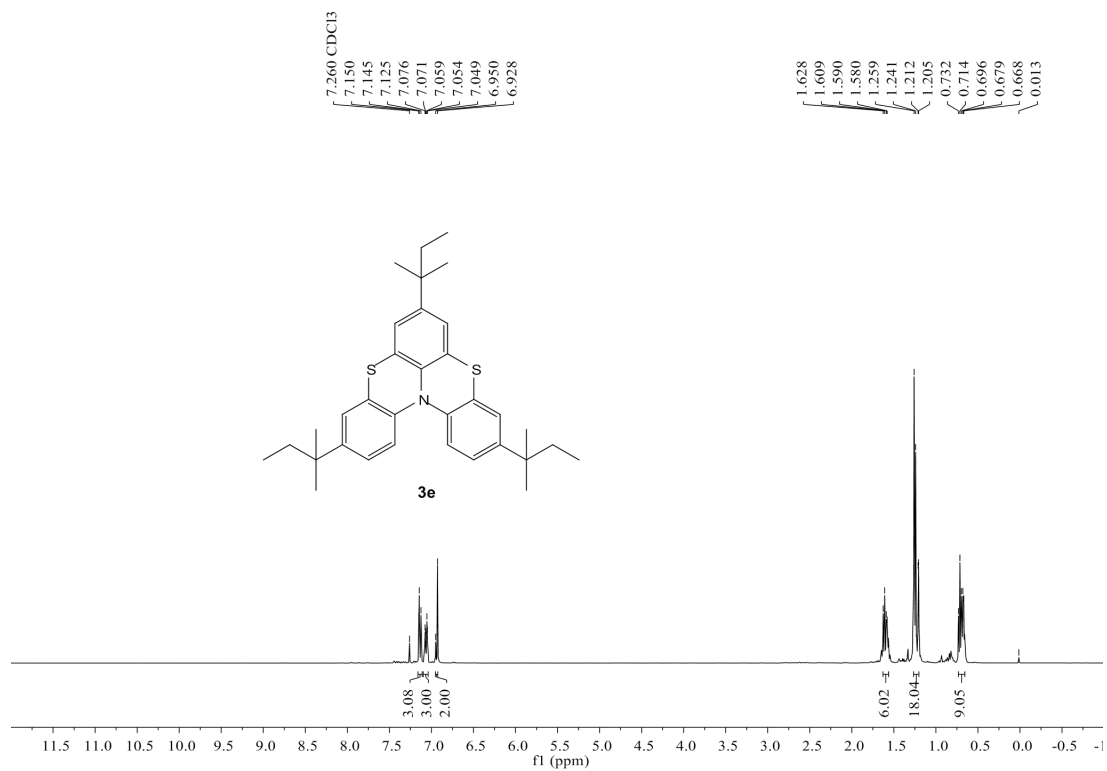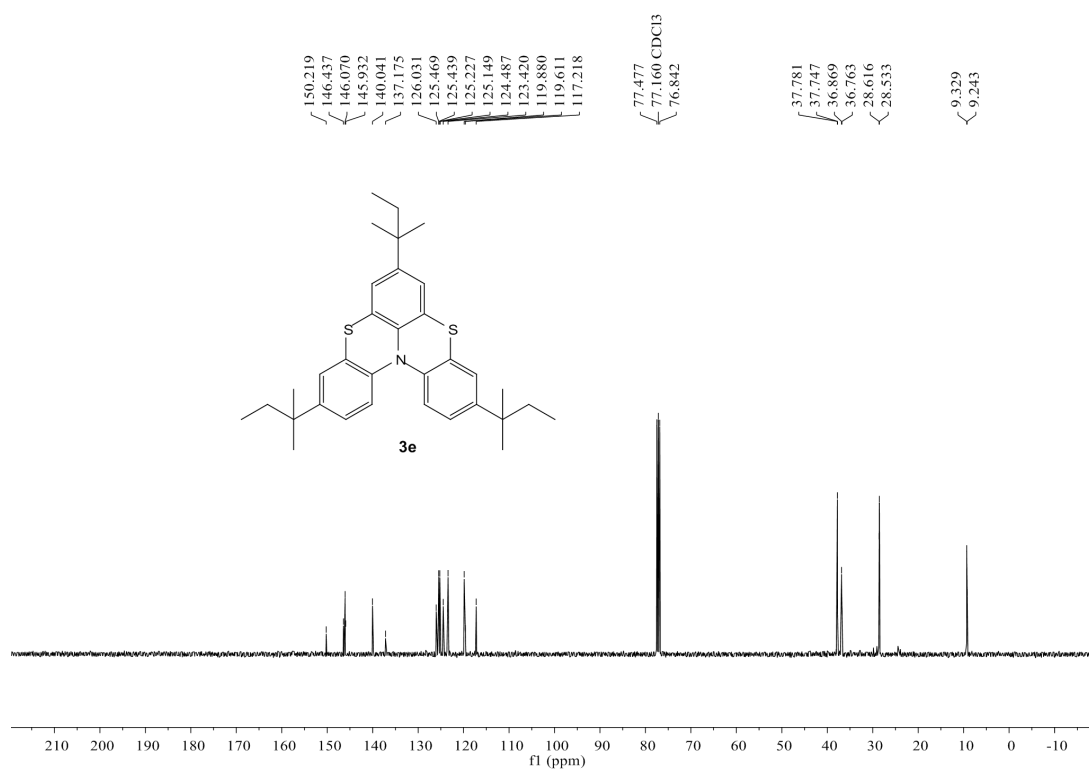

$^1\text{H}$  NMR (400 MHz) and  $^{13}\text{C}$  NMR (100 MHz) spectra of **3f** ( $\text{CDCl}_3$ )

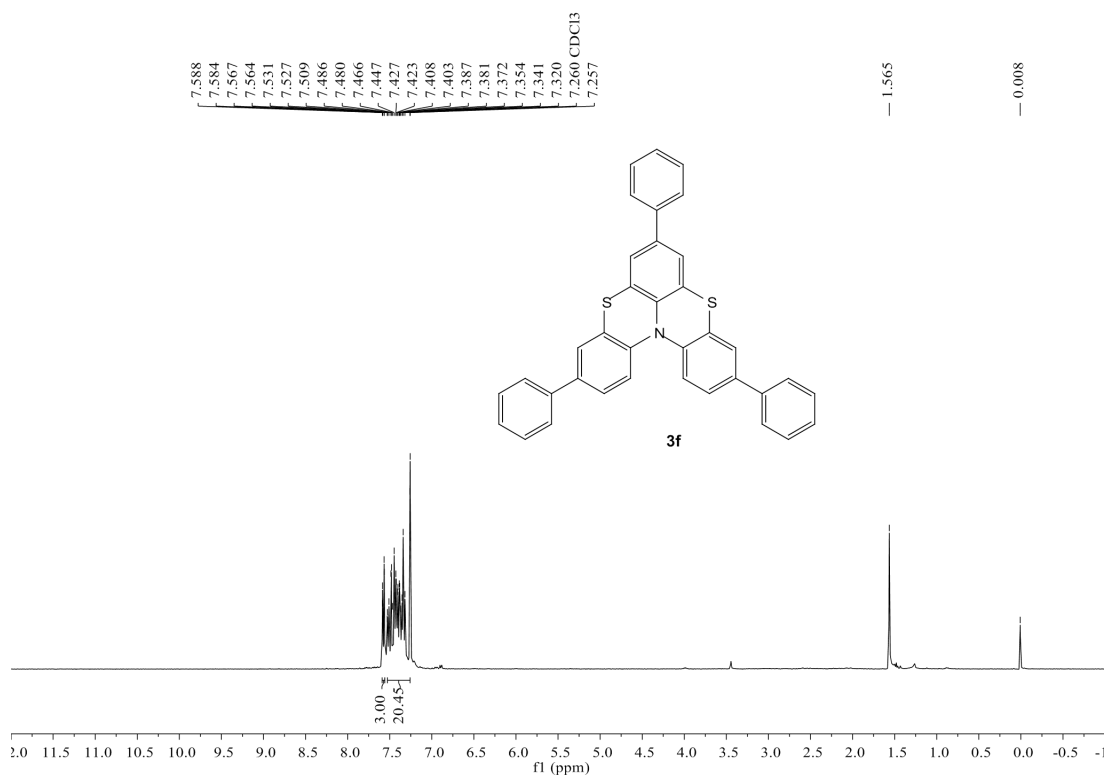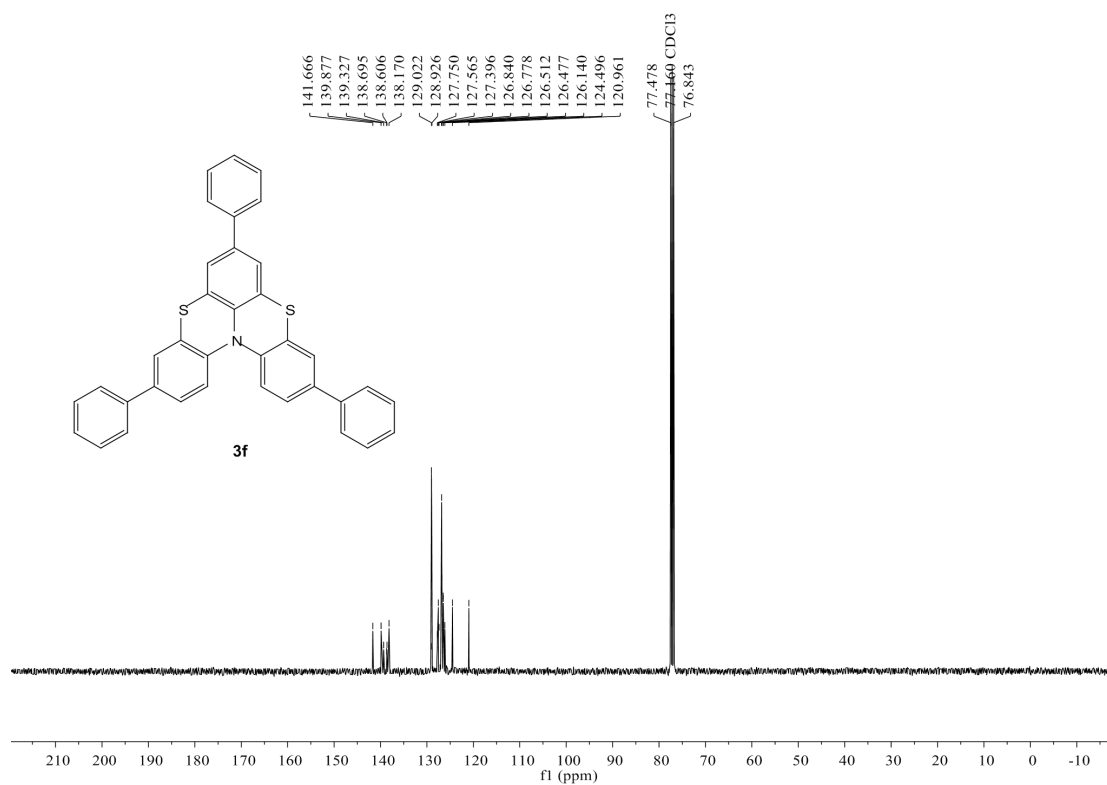

$^1\text{H}$  NMR (400 MHz) and  $^{13}\text{C}$  NMR (100 MHz) spectra of **4a** ( $\text{CDCl}_3$ )

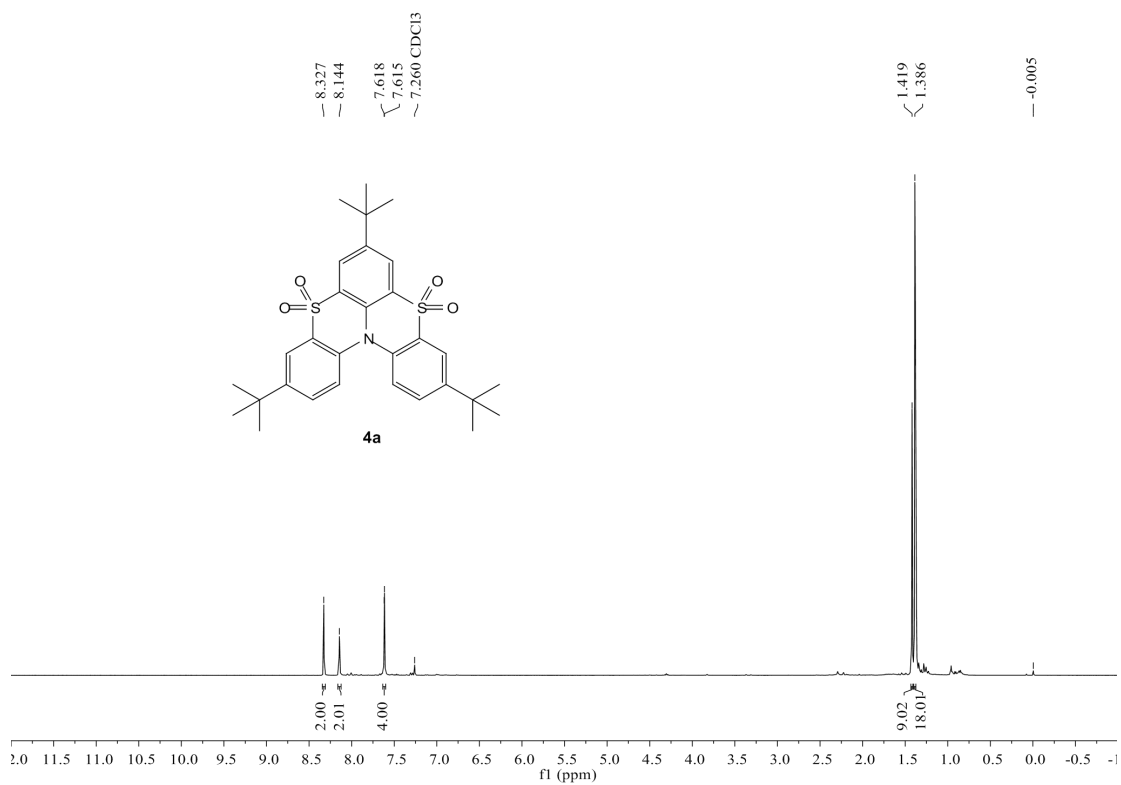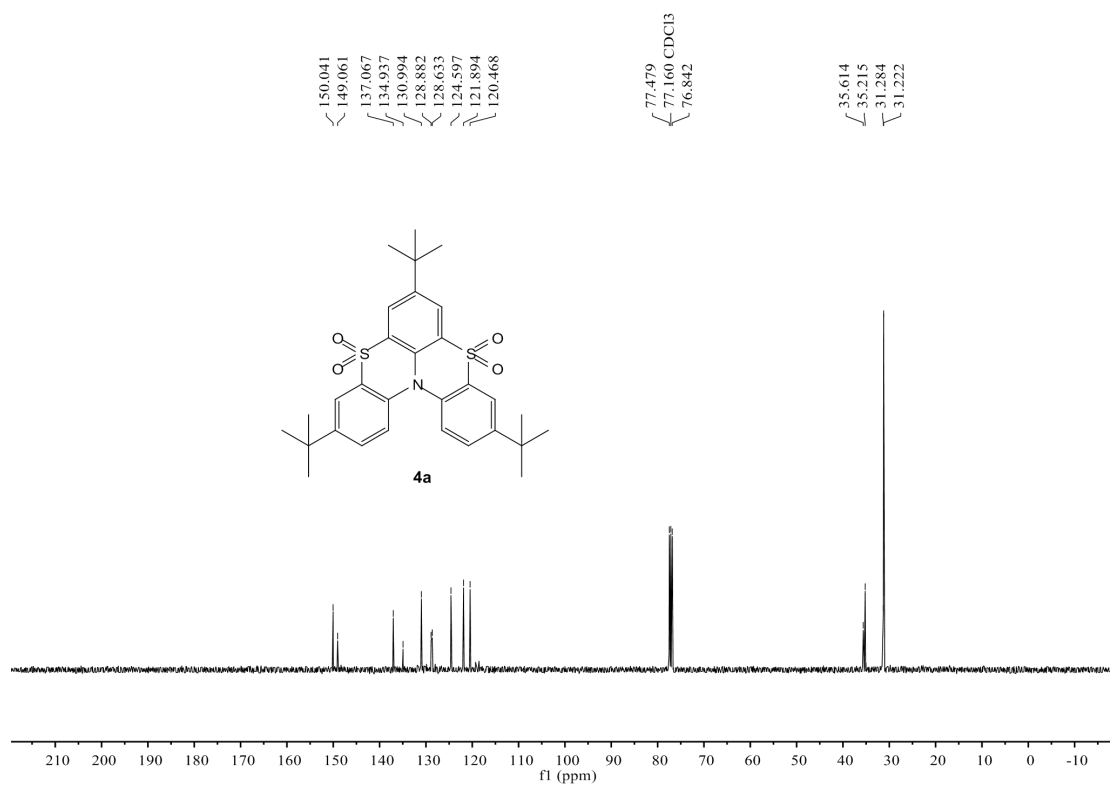

Supplement: d3ob00055a1.pdf [file d3ob00055a1.pdf]
